# Supplementary material for: Capitalising on shared goals for family planning: a concordance assessment of two global initiatives using longitudinal statistical models
Source: PubMed Central journal article supplement (PMC6858104; doi:10.1136/bmjopen-2019-031425), 2019-11-12
Supplement: bmjopen-2019-031425.draft_revisions.pdf [file bmjopen-2019-031425.draft_revisions.pdf]

# BMJ Open

BMJ Open is committed to open peer review. As part of this commitment we make the peer review history of every article we publish publicly available.

When an article is published we post the peer reviewers' comments and the authors' responses online. We also post the versions of the paper that were used during peer review. These are the versions that the peer review comments apply to.

The versions of the paper that follow are the versions that were submitted during the peer review process. They are not the versions of record or the final published versions. They should not be cited or distributed as the published version of this manuscript.

BMJ Open is an open access journal and the full, final, typeset and author-corrected version of record of the manuscript is available on our site with no access controls, subscription charges or pay-per-view fees (<http://bmjopen.bmj.com>).

If you have any questions on BMJ Open's open peer review process please email [info.bmjopen@bmj.com](mailto:info.bmjopen@bmj.com)

# BMJ Open

## Building a coalition to promote family planning through shared goals: assessing the concordance of two initiatives

|                               |                                                                                                                                                                                                                                                                                                                     |
|-------------------------------|---------------------------------------------------------------------------------------------------------------------------------------------------------------------------------------------------------------------------------------------------------------------------------------------------------------------|
| Journal:                      | <i>BMJ Open</i>                                                                                                                                                                                                                                                                                                     |
| Manuscript ID                 | bmjopen-2019-031425                                                                                                                                                                                                                                                                                                 |
| Article Type:                 | Research                                                                                                                                                                                                                                                                                                            |
| Date Submitted by the Author: | 03-May-2019                                                                                                                                                                                                                                                                                                         |
| Complete List of Authors:     | Li, Qingfeng; Johns Hopkins Bloomberg School of Public Health, International Health<br>Rimon, Jose; Johns Hopkins Bloomberg School of Public Health, Population, Family and Reproductive Health<br>Ahmed, Saifuddin; Johns Hopkins University, Population, family and reproductive Health; Johns Hopkins University |
| Keywords:                     | Family planning, Global initiatives, FP2020, 75% satisfied demand                                                                                                                                                                                                                                                   |
|                               |                                                                                                                                                                                                                                                                                                                     |

SCHOLARONE™  
Manuscripts

1  
2  
3 **Building a coalition to promote family planning through shared goals: assessing the**  
4 **concordance of two initiatives**  
5

6 **Building a coalition to promote family planning through shared goals: assessing the**  
7 **concordance of two initiatives**  
8

9  
10 Qingfeng Li<sup>1</sup>, Oying Rimon<sup>1</sup>, Saifuddin Ahmed<sup>1</sup>  
11

12 <sup>1</sup>Bill & Melinda Gates Institute for Population and Reproductive Health  
13 Department of Population, Family and Reproductive Health  
14 Johns Hopkins Bloomberg School of Public Health, Baltimore, Maryland, United States of  
15 America  
16  
17  
18  
19  
20

21 **Corresponding author:**

22 Qingfeng Li, MHS, PhD  
23 Bloomberg School of Public Health  
24 Johns Hopkins University  
25 615 North Wolfe Street W4033  
26 Baltimore, MD 21205  
27 Tel:(410) 614-4890  
28 e-mail: [qli28@jhu.edu](mailto:qli28@jhu.edu)  
29  
30  
31  
32  
33

34 **Keywords:** Family planning, Global initiatives, FP2020, 75% satisfied demand  
35  
36  
37

38 **Word Count:** Abstract: 132; Body: 2558  
39  
40  
41  
42  
43  
44  
45  
46  
47  
48  
49  
50  
51  
52  
53  
54  
55  
56  
57  
58  
59  
60

1  
2  
3 **Introduction:** Family planning is unique among medical interventions in the breadth of health,  
4 developmental and economic benefits. The complexity of formulating effective strategies to  
5 promote women and girls' access to family planning calls for closer coordination of resources  
6 and attention from all stakeholders  
7  
8  
9  
10  
11

12  
13  
14 **Objectives:** Our goal was to assess the concordance of two global initiatives through estimating  
15 the implication of accomplishing one target on the other. A demonstration of their consistency,  
16 or the lack of it, provides a better understanding of the proposed quantitative goals and helps to  
17 formulate collective strategies.  
18  
19  
20  
21  
22

23  
24  
25 **Methods:** We applied fixed effects longitudinal models to assess the convergence of two  
26 initiatives: Family Planning 2020's adding 120 million modern contraceptive users by 2020;  
27 satisfying 75% demand for modern contraceptive by 2030.  
28  
29  
30  
31  
32

33  
34  
35 **Results:** Our results show that the latter initiative implies that additional modern users will reach  
36 82 million by 2020 and then 120 million in early 2023. Among the 41 countries that have made  
37 official pledges for FP2020, five had already reached the 75% satisfied demand goal in their  
38 most recent surveys. Following FP2020's proposed annual increase of modern contraceptive use,  
39 four more countries will reach the 75% target by 2020; another nine countries will do so by  
40 2030. On the other hand, achieving the FP2020 goal by 2020 will lay a solid foundation towards  
41 the 75% target by 2030. Extending FP2020's proposed contraceptive growth to 2030 implies the  
42 achievement of the 75% target in less than half (18) of the 41 pledging countries. The situation is  
43  
44  
45  
46  
47  
48  
49  
50  
51  
52  
53  
54  
55  
56  
57  
58  
59  
60

1  
2  
3 particularly challenging in sub-Saharan Africa, where less than one third (9) of the region's 29  
4  
5 pledging countries will reach the 75% target.  
6  
7  
8  
9

10 **Conclusions:** Given the shared goal of promoting access to family planning, a broad coalition  
11  
12 needs to be formed to accomplish both initiatives.  
13  
14  
15  
16  
17  
18

### 19 **Strengths of this study**

- 20 - The first systematic comparison of two major global initiatives on family planning
- 21
- 22 - Using standard datasets of high quality
- 23
- 24 - Based on rigorously developed and validated statistical model
- 25
- 26 - Generate insights of important policy implications
- 27
- 28
- 29
- 30
- 31
- 32

### 33 **Limitations of this study**

- 34 - Relying on secondary data restricts the choice in variable selection for the statistical model
- 35
- 36
- 37
- 38
- 39
- 40
- 41
- 42
- 43
- 44
- 45
- 46
- 47
- 48
- 49
- 50
- 51
- 52
- 53
- 54
- 55
- 56
- 57
- 58
- 59
- 60

## Introduction

Access to family planning is a critical component of reproductive rights and leads to multifaceted benefits to women and their families. It is unique among medical interventions in the breadth of health, developmental and economic benefits, such as reducing maternal and child mortalities, empowering women and girls, and enhancing environmental sustainability [1, 2].

The Lancet series on family planning in 2012 documented strong evidence of the extensive gains resulting from family planning. Ahmed and colleagues estimated that contraceptive use in 172 countries averted 272,040 maternal deaths in 2008, and satisfying unmet need for contraceptive methods could prevent another 104,000 deaths per year [2]. Cleland and colleagues made nearly identical estimates using a different methodology [3]. Additionally, Canning and Schultz evaluated the economic consequences of family planning, including increases in female labor force participation and proportion in paid employment [4].

However, after reaching their global peak following the 1994 International Conference on Population and Development (ICPD) in Cairo, both financial support and political commitment for family planning have been insufficient and even declined in the decade prior to 2012 [1, 5]. Consequently, progress towards providing access to contraception to women and girls in developing countries has been slow, and on average women in Sub-Saharan Africa continue to have more than five children [6].

Compared with other public health interventions, family planning has two unique features that need special attention. First, due to cultural, religious, and political reasons, family planning is controversial than many other public health issues [1]. Even the proponents of family planning

1  
2  
3 disagree with each other over what the primary aims should be. Some emphasize ecological  
4 concerns, specifically the effect of fertility decline on population structure and economy. Others  
5 emphasize human rights concerns, promoting women's control over their own reproduction [7].  
6  
7  
8  
9  
10 Second, unlike other public health issues, such as reducing child mortality, the biomedical side  
11 of family planning is well-established, with proven methods to space and limit pregnancies.  
12  
13  
14 Where the successful implementation of family planning programs is concerned, it has been  
15 established that a key element is a political issue of obtaining support from and forming a broad  
16 coalition of elite groups [1, 7]. This has proved to be more elusive.  
17  
18  
19  
20  
21  
22  
23

24 The complexity of formulating effective strategies to promote women and girls' access to family  
25 planning calls for closer coordination of resources and attention from all stakeholders. As noted  
26 by Kim and Ammann (2004), a clear consensus on targets and priorities are indispensable for all  
27 successful public projects in the modern era [8].  
28  
29  
30  
31  
32  
33  
34

35 During the past few years, two major family planning initiatives were launched: (1) the London  
36 Summit on Family Planning of July 2012, convened by the UK Department for International  
37 Development (DFID) and the Bill & Melinda Gates Foundation (BMDF), proposed to add 120  
38 million modern contraceptive users in the world's 69 poorest countries by 2020 [9]; (2) United  
39 States Agency for International Development (USAID) set a target of satisfying 75% of the  
40 demand for family planning with modern contraceptives by 2030 [10]. The percentage satisfied  
41 demand is the proportion of women who use modern contraception divided by the total demand  
42 for family planning, which is defined by adding the percentage of married or in-union women  
43 aged 15-49 who are using any contraception to the percentage of women with unmet need.  
44  
45  
46  
47  
48  
49  
50  
51  
52  
53  
54  
55  
56  
57

1  
2  
3 Following Fabic et al. (Lancet 2014), in the present study, we only consider the demand for FP  
4 among married or in-union women aged 15-49 years [10].  
5  
6  
7  
8  
9

10 FP2020 and 75% satisfied demand initiatives are two unprecedentedly ambitious initiatives on  
11 family planning. A recent assessment has found progress has been slow and the FP2020 goal  
12 overambitious [11]. Given the scale of the initiatives and the number of partners involved in the  
13 family planning field, improved coordination, and a broader coalition is necessary to achieve the  
14 targets. The objective of this study is to assess the concordance of these two initiatives through  
15 estimating the implication of accomplishing one target on the other. A demonstration of their  
16 consistency, or the lack of it, provides a better understanding of the proposed quantitative goals  
17 and helps to formulate collective strategies.  
18  
19  
20  
21  
22  
23  
24  
25  
26  
27  
28  
29

### 30 **Data**

31 The contraceptive prevalence data are from the United Nations Development Programme  
32 (UNDP) survey-based estimates of the percentage of married or in-union women aged 15-49  
33 using any modern contraceptive methods [12]. 466 surveys conducted from 1986 to 2016 in 142  
34 countries collected modern contraceptive prevalence rate (mCPR) and % satisfied demand.  
35  
36 Among the 70 FP2020 focus countries (South Africa joined the FP2020 Initiative after the  
37 London Summit), three countries (Djibouti, Somalia, and Western Sahara) do not have any  
38 survey-based estimates on mCPR and % satisfied demand and therefore are excluded from the  
39 present study. In the end, our study is based on 67 FP2020 focus countries, with a focus on the  
40 41 countries that made a commitment to the FP2020 Initiative (defined as pledging countries; see  
41 [www.familyplanning2020.org](http://www.familyplanning2020.org) for a full and up-to-date list; accessed on February 20, 2019).  
42  
43  
44  
45  
46  
47  
48  
49  
50  
51  
52  
53  
54  
55  
56  
57  
58  
59  
60



## Methods

The congruence between FP2020 and 75% satisfied demand targets requires a bi-directional assessment. We estimated the implications of achieving one of them on the other. Specifically, the study attempts to answer the following two questions: (1) how many additional users will be added following the 75% satisfied demand target; (2): what percentage of demand will be satisfied in 41 pledging countries assuming a 1.5% annual increase from 2012 until 2030? We used 1.5% since it is close to the overall target proposed by the London Summit on Family Planning Metrics Group across all FP2020 focus countries [9]. It is considered an aspirational yet achievable goal assuming the resources and leadership around current family planning programs may be collectively mobilized. These two assessments are conducted separately, albeit employing a similar methodology (Figure 1).

<Figure 1 about here>

There are three steps to answer the first research question. The first step is to estimate the necessary married-woman mCPR to satisfy 75% demand with modern methods by 2030. Among the 41 pledging countries, five FP2020 pledging countries had already reached the 75% satisfied demand goal in their most recent surveys (Table 1). It is reasonable to assume that in those countries no additional activities are needed to achieve the 75% satisfied demand by 2030 goal. We assume the mCPR and % satisfied demand will remain at their most recent observed level until 2030.

<Table 1 about here>

For the other 36 countries, the percentage of FP demand satisfied with modern methods will reach 75% in 2030. Then we employ the following country-level fixed effects longitudinal model to estimate the required mCPR for the assumed 75% satisfied demand.

$$y_{it} = \beta_0 + \beta_1 x_{it} + \beta_2 x_{it}^2 + \alpha_i + \varepsilon_{it} \quad (1)$$

where  $y_{it}$  denote the mCPR for country  $i$  in time  $t$ ;  $x_{it}$  denotes the % satisfied demand for country  $i$  in time  $t$ ;  $\alpha_i$  denotes the time-invariant unobserved fixed effects for country  $i$ ;  $\varepsilon_{it}$  denotes the error term. The mode is chosen from several options due to its best predictive performance. The model is first fitted using survey-based data compiled by the United Nations. The Least Squares Dummy Variable (LSDV) method is used in model estimation [13]. This approach explicitly provides the coefficients of the country dummy, which is required in predicting the mCPR for the assumed 75% satisfied demand in 2030. Then with the estimated coefficients and country-level fixed effects, we estimate mCPR for the assumed 75% satisfied demand.

The second step is to convert the married all-woman mCPR estimated in step 1 to all women all-woman mCPR. 262 DHS surveys based on samples of all women of reproductive ages were conducted from 1990 to 2016 in 85 countries. We use the following fixed effect longitudinal model to estimate all-woman mCPR from married mCPR

$$y_i = \beta_0 + \beta_1 x_i + u_i + \varepsilon_{it} \quad (2)$$

where  $y_i$  and  $x_i$  denote the all-woman and married mCPR in survey  $i$ ;  $u_i$  denotes region (SSA vs. non-SSA) level fixed effects. We use region level instead of country level fixed effects because a model with country level fixed effects cannot be used for prediction in FP2020 countries without a DHS survey.

In the third step, we assume all-woman mCPR will increase linearly from the level in the last survey to the level estimated for 2030 in step 2. Using the number of women of reproductive age obtained from World Population Prospects 2017 [14], we calculate the number of modern contraceptive users in the 67 FP2020 focus countries.

The second research question is answered similarly in three steps (Figure 1). We first estimate the baseline, i.e., all-woman mCPR in 2012. Our principle is to rely on the survey-based estimates as much as possible. As mentioned above, 5 of the 41 FP2020 pledging countries had already reached the 75% satisfied demand goal in their most recent surveys, and therefore are excluded from this investigation. Among the other 36 pledging countries, 10 conducted a survey in 2012. For those 19 countries that have surveyed conducted both before and after 2012, we use the two surveys before and after 2012 to linearly interpolate the mCPR for 2012. For the other 7 countries that only have surveys conducted before 2012, we used the last survey-based estimate for 2012.

1  
2  
3 Then we impose a 1.5% annual increase in all-woman mCPR from 2012 until 2030. Finally, we  
4  
5 predict the % satisfied demand associated with the calculated levels of all-woman mCPR for  
6  
7 2012-2030 based on a fixed effects longitudinal model similar to Equation (1), but reversing the  
8  
9 meaning of  $y_{it}$  and  $x_{it}$ :  $y_{it}$  denotes the mCPR and  $x_{it}$  denotes the % satisfied demand for country  
10  
11  $i$  in time  $t$ .  
12  
13

#### 14 Patient and Public Involvement

15  
16  
17 The study does not involve patients or public.  
18  
19  
20  
21

#### 22 Results

23  
24  
25  
26 All three fixed effects longitudinal models fit the data quite well, indicating excellent predictive  
27  
28 performance (Table 2). Using 466 survey-based estimates, the adjusted R-squared of the model  
29  
30 regressing all-woman mCPR on % satisfied demand and a country dummy is above 0.98,  
31  
32 meaning that less than 2% of the variations in all-woman mCPR cannot be explained by the  
33  
34 model (Model 1). As a result, the estimated all-woman mCPR based on the assumed 75%  
35  
36 satisfied demand should be highly accurate and reliable. The adjusted R-squared is 0.97 in the  
37  
38 regression model of all-woman mCPR on married mCPR and a region dummy based on 262  
39  
40 DHS surveys (Model 2). Such a strong correlation also indicates accurate conversion from  
41  
42 married to all-woman mCPR. Another model, regressing % satisfied demand on married mCPR,  
43  
44 also achieved an R-squared of 0.97, which ensures the accuracy in estimating % satisfied  
45  
46 demand based on the assumed mCPR (Model 3).  
47  
48  
49  
50  
51  
52  
53

54 <Table 2 about here>  
55  
56  
57

1  
2  
3  
4  
5 Achieving the 75% satisfied demand by 2030 goal means a gain of approximately 82 million  
6 additional users in these 66 FP2020 countries from 2012 to 2020, which is about 68% of the 120  
7 million proposed by the FP2020 Initiative (Table 3). From 2012 to 2020, these 41 pledging  
8 countries will contribute 74 million additional users while these 26 non-pledging FP2020  
9 countries contribute 18 million. Following the trajectory of increasing mCPR and % satisfied  
10 demand, the goal of adding 120 million modern contraceptive users will be achieved in early  
11 2023 (Figure 2). By 2030, there will be 184 and 21 million additional users in pledging and non-  
12 pledging countries, respectively, making a total number of 206 additional modern contraceptive  
13 users in these 66 FP2020 countries.  
14  
15  
16  
17  
18  
19  
20  
21  
22  
23  
24  
25  
26  
27

28 <Table 3 about here>  
29  
30  
31  
32

33 Five of the 41 FP2020 pledging countries, three of them in sub-Saharan Africa, had already  
34 satisfied 75% or more of the contraceptive demand in their last survey. Among the other 36  
35 pledging countries, only four additional countries (Bangladesh, India, Malawi, and Vietnam) will  
36 reach that target by 2020 following FP2020's proposed 1.5% annual increase in mCPR (Table 4).  
37 Another 9 countries (Ethiopia, Laos, Madagascar, Nepal, Philippines, Rwanda, Solomon Islands,  
38 Tanzania, and Zambia). Disaggregated by region, the situation is more challenging in sub-Saharan  
39 Africa, where only one of the 26 pledging countries will reach the 75% target by 2020, and only  
40 6 by 2030. Adding those 3 countries that had already reached the target by their most recent  
41 surveys, less than one third (9) of the 29 pledging countries in this region will satisfy 75%  
42 demand for family planning by 2030. In other regions, 5 countries will achieve the target by  
43  
44  
45  
46  
47  
48  
49  
50  
51  
52  
53  
54  
55  
56  
57  
58  
59  
60

1  
2  
3 2020 and 9 will do so by 2030, representing three-quarters of the 12 non-SSA pledging  
4  
5 countries.  
6  
7  
8  
9

10 In sum, the % satisfied will reach 75% in less than half (18) of the 41 FP2020 pledging countries.  
11  
12  
13

14 <Table 4 about here>  
15  
16  
17  
18

### 19 **Limitations**

20  
21 Despite the highly satisfactory model fit, our regressions could be theoretically improved by  
22 including other factors such as calendar time. We did not include year as a covariate because its  
23 coefficient reflects not only temporal effects but also the changing composition of countries in  
24 the database. For example, the earliest DHS surveys were mostly in Africa while Asia was added  
25 later. So the absence of calendar time in the model is a limitation with the database rather than  
26 our methodology. Since we are mainly interested in the predictive performance of the model,  
27 measured by the adjusted R-squared, and adding year as a covariate changed the adjusted R-  
28 squared by less than 1 percentage point, our final model did not consider calendar time.  
29  
30  
31  
32  
33  
34  
35  
36  
37  
38  
39  
40  
41

### 42 **Discussion**

43  
44 The contribution of the study is an improved understanding of the convergence of targets of two  
45 global family planning initiatives: FP2020's adding 120 modern contraceptive users by 2020 in  
46 69 of the world's poorest countries and USAID's satisfying 75% demand for family planning  
47 with modern contraceptives. We estimate and discuss the implication of reaching one target on  
48 the other. The shared goal may facilitate building a broad coalition to promote family planning in  
49  
50  
51  
52  
53  
54  
55  
56  
57  
58  
59  
60

1  
2  
3 the developing world. These two initiatives represent the objectives of two major donors of  
4 family planning [15]. A consensus goal is critical to building a broad coalition to collectively and  
5 effectively mobilize financial and political resources, and capture global attention.  
6  
7  
8  
9

10  
11  
12 Our results show that the two initiatives move towards the same goal of promoting access to  
13 family planning for women and girls. Overall, achieving the 75% satisfied demand goal by 2030  
14 implies that 120 million modern contraceptive users will be added by 2023 in 67 FP2020 focus  
15 countries, only three years later than the original goal set by FP2020. On the other hand,  
16 achieving a 1.5% annual increase in all-woman mCPR will enable less than half of the 41  
17 pledging countries to attain the goal of 75% satisfied demand by 2030.  
18  
19  
20  
21  
22  
23  
24  
25  
26  
27

28 As repeatedly emphasized in the London Summit document, setting a quantitative target should  
29 not cause concern among those firmly committed to sexual and reproductive health and rights  
30 because all interventions will have women's rights at the center of their implementation efforts.  
31 Our assessment in this study of the congruence of major, recently articulated family planning  
32 initiatives aims to unite international communities into collective actions that secure women's  
33 and girls' access to effective contraceptive methods.  
34  
35  
36  
37  
38  
39  
40  
41

42 **Author contributions:** QL, SA, and JR devised the study and wrote the article. QL compiled the  
43 data and led the statistical modeling and analysis.  
44

45  
46  
47 **Disclosure statement:** No potential conflict of interest was reported by the authors.  
48

49 **Ethics and consent:** Not required  
50

51 **Funding:** Bill and Melinda Gates Foundation  
52

## 53 **References**

54  
55 1. Cleland J, Bernstein S, Ezeh A, Faundes A, Glasier A, Innis J. Family planning: the unfinished  
56 agenda. *The Lancet*. 2006;368(9549):1810-27.  
57

- 1
- 2
- 3
- 4 2. Ahmed S, Li Q, Liu L, Tsui AO. Maternal deaths averted by contraceptive use: an analysis of 172
- 5 countries. *The Lancet*. 2012;380(9837):111-25.
- 6
- 7 3. Cleland J, Conde-Agudelo A, Peterson H, Ross J, Tsui A. Contraception and health. *Lancet*
- 8 (London, England). 2012;380(9837):149-56.
- 9
- 10 4. Canning D, Schultz TP. The economic consequences of reproductive health and family planning.
- 11 *Lancet* (London, England). 2012;380(9837):165-71.
- 12
- 13 5. Cohen SA. London summit puts family planning back on the agenda, offers new lease on life for
- 14 millions of women and girls. *Guttmacher Policy Review*. 2012;15(3):20-4.
- 15
- 16 6. Ezeh AC, Bongaarts J, Mberu B. Global population trends and policy options. *Lancet* (London,
- 17 England). 2012;380(9837):142-8.
- 18
- 19 7. Shiffman J, Quissell K. Family planning: a political issue. *Lancet* (London, England).
- 20 2012;380(9837):181-5.
- 21
- 22 8. Kim JY, Ammann A. Is the "3 by 5" Initiative the Best Approach to Tackling the HIV Pandemic?
- 23 *PLoS Medicine*. 2004;1(2):e37.
- 24
- 25 9. Brown W, Druce N, Bunting J, Radloff S, Koroma D, Gupta S, et al. Developing the "120 by 20"
- 26 goal for the Global FP2020 Initiative. *Studies in family planning*. 2014;45(1):73-84.
- 27
- 28 10. Fabic MS, Choi Y, Bongaarts J, Darroch JE, Ross JA, Stover J, et al. Meeting demand for family
- 29 planning within a generation: the post-2015 agenda. *Lancet* (London, England). 2015;385(9981):1928-
- 30 31.
- 31
- 32 11. Cahill N, Sonneveldt E, Stover J, Weinberger M, Williamson J, Wei C, et al. Modern contraceptive
- 33 use, unmet need, and demand satisfied among women of reproductive age who are married or in a
- 34 union in the focus countries of the Family Planning 2020 initiative: a systematic analysis using the Family
- 35 Planning Estimation Tool. *Lancet* (London, England). 2017.
- 36
- 37 12. United Nations DoEaSA, Population Division (2017). *World Contraceptive Use 2017*
- 38 (POP/DB/CP/Rev2017).
- 39
- 40 13. Greene WH. *Econometric analysis*: Prentice Hall; 2011.
- 41
- 42 14. United Nations DoEaSA, Population Division, W. *World Population Prospects: The 2017 Revision,*
- 43 *Key Findings and Advance Tables*. Working Paper No. ESA/P/WP/248. 2017.
- 44
- 45 15. IHME. *Financing Global Health 2014: Shifts in Funding as the MDG Era Closes*. Seattle, WA:
- 46 IHME2015.
- 47
- 48
- 49
- 50
- 51
- 52
- 53
- 54
- 55
- 56
- 57
- 58
- 59
- 60



1  
2  
3 Figure 1: Analytical flowchart for the two research questions  
4

5  
6 Figure 2: Number of additional modern contraceptive users in 41 pledging and 26 non-pledging  
7 countries assuming the trajectory of satisfying 75% demand by 2030  
8  
9  
10  
11  
12  
13  
14  
15  
16  
17  
18  
19  
20  
21  
22  
23  
24  
25  
26  
27  
28  
29  
30  
31  
32  
33  
34  
35  
36  
37  
38  
39  
40  
41  
42  
43  
44  
45  
46  
47  
48  
49  
50  
51  
52  
53  
54  
55  
56  
57  
58  
59  
60

For peer review only

Table 1: Modern contraceptive prevalence rate (mCPR) in 5 pledging countries where % demand satisfied exceeded 75% in the last survey

| Country      | Region  | Survey date | mCPR | % demand satisfied |
|--------------|---------|-------------|------|--------------------|
| Myanmar      | Non-SSA | 2015-16     | 51.3 | 75.0               |
| Kenya        | SSA     | 2015        | 62.6 | 76.2               |
| Indonesia    | Non-SSA | 2015-16     | 59.5 | 78.8               |
| South Africa | SSA     | 2003-04     | 59.8 | 81.1               |
| Zimbabwe     | SSA     | 2015        | 65.8 | 85.2               |

Notes: SSA denotes sub-Saharan Africa; non-SSA includes all other regions

Table 2: Goodness of fit of the fixed effects longitudinal models

|                      | Model 1                                      | Model 2                     | Model 3                          |
|----------------------|----------------------------------------------|-----------------------------|----------------------------------|
| <b>Outcome</b>       | Married mCPR                                 | All-woman mCPR              | % satisfied demand               |
| <b>Covariates</b>    | % satisfied demand<br>(% satisfied demand)^2 | Married mCPR                | Married mCPR<br>(married mCPR)^2 |
| <b>Fixed effects</b> | Country level                                | Region (SSA; non-SSA) level | Country level                    |
| <b>Sample size</b>   | 466                                          | 262                         | 466                              |
| <b>R-squared</b>     | 0.98                                         | 0.91                        | 0.97                             |

Table 3: Modern contraceptive prevalence rate (mCPR), modern contraceptive users (thousand), and added users since 2012 (thousand) in 41 pledging and 26 non-pledging countries under FP2020

| Country                        | 2012 |         | 2020 |         |             | 2030 |         |             |
|--------------------------------|------|---------|------|---------|-------------|------|---------|-------------|
|                                | mCPR | Users   | mCPR | Users   | Added users | mCPR | Users   | Added users |
| <b>Pledging countries (41)</b> |      |         |      |         |             |      |         |             |
| Afghanistan                    | 10.4 | 691     | 22.7 | 2,065   | 1,374       | 38.1 | 4,645   | 3,954       |
| Bangladesh                     | 41.2 | 17,800  | 42.4 | 20,200  | 2,366       | 43.8 | 22,200  | 4,369       |
| Benin                          | 7.0  | 158     | 22.0 | 636     | 478         | 40.9 | 1,570   | 1,412       |
| Burkina Faso                   | 13.5 | 515     | 25.5 | 1,249   | 734         | 40.5 | 2,704   | 2,189       |
| Burundi                        | 16.7 | 371     | 27.5 | 768     | 397         | 41.0 | 1,599   | 1,229       |
| Cameroon                       | 14.2 | 708     | 25.8 | 1,621   | 913         | 40.3 | 3,362   | 2,655       |
| Chad                           | -0.4 | (12)    | 17.2 | 639     | 651         | 39.3 | 2,040   | 2,052       |
| Côte d'Ivoire                  | 11.5 | 566     | 24.2 | 1,509   | 943         | 39.9 | 3,277   | 2,711       |
| DR Congo                       | 3.9  | 594     | 20.3 | 4,066   | 3,472       | 40.8 | 11,600  | 11,000      |
| Ethiopia                       | 26.2 | 5,677   | 32.6 | 9,285   | 3,608       | 40.5 | 15,100  | 9,398       |
| Ghana                          | 14.3 | 935     | 26.9 | 2,093   | 1,158       | 42.6 | 4,080   | 3,145       |
| Guinea                         | 4.8  | 124     | 20.1 | 655     | 531         | 39.2 | 1,711   | 1,588       |
| Haiti                          | 24.5 | 663     | 32.9 | 1,009   | 346         | 43.3 | 1,493   | 829         |
| India                          | 35.7 | 115,000 | 38.5 | 138,000 | 22,600      | 41.9 | 162,000 | 46,700      |
| Indonesia                      | 45.7 | 31,000  | 45.7 | 32,900  | 1,904       | 45.7 | 34,600  | 3,521       |
| Kenya                          | 47.1 | 5,076   | 47.7 | 6,592   | 1,516       | 48.5 | 8,575   | 3,499       |
| Laos                           | 33.4 | 570     | 38.1 | 742     | 171         | 44.1 | 972     | 401         |
| Liberia                        | 14.2 | 139     | 25.9 | 318     | 179         | 40.6 | 649     | 510         |
| Madagascar                     | 26.2 | 1,395   | 32.8 | 2,246   | 851         | 41.0 | 3,674   | 2,280       |
| Malawi                         | 45.4 | 1,696   | 44.7 | 2,218   | 522         | 44.0 | 2,984   | 1,289       |
| Mali                           | 7.6  | 268     | 21.2 | 962     | 694         | 38.1 | 2,427   | 2,160       |
| Mauritania                     | 7.6  | 70      | 22.2 | 259     | 189         | 40.5 | 610     | 540         |
| Mozambique                     | 11.3 | 676     | 23.3 | 1,792   | 1,115       | 38.2 | 4,002   | 3,325       |

|    |  |                                    |      |                |      |                |               |      |                |                |
|----|--|------------------------------------|------|----------------|------|----------------|---------------|------|----------------|----------------|
| 1  |  |                                    |      |                |      |                |               |      |                |                |
| 2  |  |                                    |      |                |      |                |               |      |                |                |
| 3  |  |                                    |      |                |      |                |               |      |                |                |
| 4  |  | Myanmar                            | 39.5 | 5,503          | 39.5 | 5,956          | 453           | 39.5 | 6,197          | 694            |
| 5  |  | Nepal                              | 34.0 | 2,504          | 38.1 | 3,293          | 789           | 43.4 | 4,078          | 1,574          |
| 6  |  | Niger                              | 5.2  | 192            | 19.2 | 971            | 778           | 36.6 | 2,781          | 2,588          |
| 7  |  | Nigeria                            | 6.2  | 2,364          | 20.5 | 9,773          | 7,409         | 38.5 | 24,200         | 21,900         |
| 8  |  | Pakistan                           | 20.0 | 8,935          | 29.5 | 15,400         | 6,475         | 41.3 | 26,100         | 17,100         |
| 9  |  | Philippines                        | 28.1 | 7,022          | 35.8 | 10,100         | 3,100         | 45.5 | 14,700         | 7,664          |
| 10 |  | Rwanda                             | 36.1 | 974            | 39.2 | 1,326          | 353           | 43.1 | 1,880          | 906            |
| 11 |  | Senegal                            | 12.8 | 429            | 24.7 | 1,040          | 611           | 39.6 | 2,217          | 1,787          |
| 12 |  | Sierra Leone                       | 11.6 | 188            | 23.7 | 479            | 291           | 38.8 | 997            | 809            |
| 13 |  | Solomon Islands                    | 24.1 | 33             | 28.0 | 45             | 13            | 32.7 | 64             | 31             |
| 14 |  | South Africa                       | 46.4 | 6,715          | 46.4 | 7,366          | 651           | 46.4 | 8,067          | 1,352          |
| 15 |  | South Sudan                        | 6.3  | 160            | 21.2 | 697            | 537           | 39.9 | 1,715          | 1,555          |
| 16 |  | Togo                               | 11.8 | 195            | 25.1 | 516            | 322           | 41.7 | 1,109          | 915            |
| 17 |  | Uganda                             | 20.5 | 1,652          | 30.7 | 3,355          | 1,703         | 43.4 | 6,715          | 5,062          |
| 18 |  | Tanzania                           | 21.8 | 2,483          | 30.1 | 4,459          | 1,976         | 40.4 | 8,243          | 5,760          |
| 19 |  | Viet Nam                           | 43.4 | 11,200         | 45.8 | 11,900         | 686           | 48.8 | 12,600         | 1,401          |
| 20 |  | Zambia                             | 34.3 | 1,176          | 38.0 | 1,731          | 555           | 42.7 | 2,627          | 1,451          |
| 21 |  | Zimbabwe                           | 50.9 | 1,944          | 50.9 | 2,366          | 422           | 50.9 | 3,010          | 1,066          |
| 22 |  | <b>Subtotal</b>                    |      | <b>238,350</b> |      | <b>312,597</b> | <b>73,836</b> |      | <b>423,176</b> | <b>184,372</b> |
| 23 |  |                                    |      |                |      |                |               |      |                |                |
| 24 |  |                                    |      |                |      |                |               |      |                |                |
| 25 |  |                                    |      |                |      |                |               |      |                |                |
| 26 |  |                                    |      |                |      |                |               |      |                |                |
| 27 |  |                                    |      |                |      |                |               |      |                |                |
| 28 |  |                                    |      |                |      |                |               |      |                |                |
| 29 |  |                                    |      |                |      |                |               |      |                |                |
| 30 |  | <b>Non-pledging countries (26)</b> |      |                |      |                |               |      |                |                |
| 31 |  | Bhutan                             | 50.2 | 101            | 50.2 | 114            | 14            | 50.2 | 124            | 23             |
| 32 |  | Bolivia                            | 30.5 | 788            | 37.6 | 1,129          | 341           | 46.6 | 1,590          | 801            |
| 33 |  | Cambodia                           | 28.5 | 1,159          | 35.1 | 1,581          | 422           | 43.3 | 2,281          | 1,121          |
| 34 |  | Central African Republic           | 12.7 | 133            | 24.7 | 292            | 158           | 39.7 | 627            | 493            |
| 35 |  | Comoros                            | 12.0 | 21             | 25.3 | 54             | 33            | 41.9 | 114            | 92             |
| 36 |  | Congo                              | 10.9 | 120            | 24.9 | 334            | 214           | 42.3 | 755            | 635            |
| 37 |  | Egypt                              | 43.8 | 9,961          | 43.8 | 11,200         | 1,256         | 43.8 | 13,200         | 3,262          |
| 38 |  | Eritrea                            | 9.9  | 108            | 23.1 | 311            | 203           | 39.6 | 704            | 595            |
| 39 |  |                                    |      |                |      |                |               |      |                |                |
| 40 |  |                                    |      |                |      |                |               |      |                |                |
| 41 |  |                                    |      |                |      |                |               |      |                |                |
| 42 |  |                                    |      |                |      |                |               |      |                |                |
| 43 |  |                                    |      |                |      |                |               |      |                |                |
| 44 |  |                                    |      |                |      |                |               |      |                |                |
| 45 |  |                                    |      |                |      |                |               |      |                |                |
| 46 |  |                                    |      |                |      |                |               |      |                |                |
| 47 |  |                                    |      |                |      |                |               |      |                |                |

|    |  |                                   |      |                |      |                |               |      |                |                |
|----|--|-----------------------------------|------|----------------|------|----------------|---------------|------|----------------|----------------|
| 1  |  |                                   |      |                |      |                |               |      |                |                |
| 2  |  |                                   |      |                |      |                |               |      |                |                |
| 3  |  |                                   |      |                |      |                |               |      |                |                |
| 4  |  | Gambia                            | 5.6  | 24             | 19.8 | 109            | 85            | 37.6 | 282            | 258            |
| 5  |  | Guinea-Bissau                     | 10.2 | 41             | 18.1 | 90             | 49            | 27.9 | 180            | 139            |
| 6  |  | Honduras                          | 49.0 | 1,104          | 49.0 | 1,319          | 215           | 49.0 | 1,495          | 391            |
| 7  |  | Iraq                              | 28.5 | 2,270          | 33.5 | 3,367          | 1,097         | 39.6 | 5,157          | 2,887          |
| 8  |  | Kyrgyzstan                        | 26.3 | 401            | 32.1 | 501            | 100           | 39.4 | 703            | 301            |
| 9  |  | Lesotho                           | 46.4 | 251            | 46.4 | 290            | 39            | 46.4 | 337            | 86             |
| 10 |  | Mongolia                          | 36.9 | 305            | 39.5 | 331            | 26            | 42.8 | 392            | 87             |
| 11 |  | Nicaragua                         | 59.2 | 960            | 59.2 | 1,053          | 93            | 59.2 | 1,119          | 159            |
| 12 |  | North Korea                       | 58.5 | 3,899          | 58.5 | 3,800          | (100)         | 58.5 | 3,654          | (246)          |
| 13 |  | Palestine                         | 33.1 | 348            | 37.0 | 490            | 143           | 41.9 | 717            | 369            |
| 14 |  | Papua New Guinea                  | 24.6 | 449            | 32.5 | 717            | 267           | 42.3 | 1,130          | 680            |
| 15 |  | Sao Tome and Principe             | 27.3 | 12             | 36.2 | 19             | 7             | 47.4 | 32             | 20             |
| 16 |  | Sri Lanka                         | 42.1 | 2,251          | 44.6 | 2,374          | 123           | 47.6 | 2,473          | 222            |
| 17 |  | Sudan                             | 6.5  | 552            | 21.1 | 2,240          | 1,688         | 39.3 | 5,425          | 4,873          |
| 18 |  | Tajikistan                        | 20.3 | 428            | 28.0 | 670            | 242           | 37.5 | 1,086          | 657            |
| 19 |  | Timor-Leste                       | 18.2 | 46             | 24.0 | 74             | 28            | 31.1 | 127            | 81             |
| 20 |  | Uzbekistan                        | 39.9 | 3,334          | 40.1 | 3,597          | 263           | 40.3 | 3,964          | 630            |
| 21 |  | Yemen                             | 21.8 | 1,326          | 30.3 | 2,339          | 1,013         | 41.0 | 4,079          | 2,753          |
| 22 |  | <b>Subtotal</b>                   |      | <b>30,395</b>  |      | <b>38,397</b>  | <b>8,019</b>  |      | <b>51,744</b>  | <b>21,372</b>  |
| 23 |  |                                   |      |                |      |                |               |      |                |                |
| 24 |  |                                   |      |                |      |                |               |      |                |                |
| 25 |  |                                   |      |                |      |                |               |      |                |                |
| 26 |  |                                   |      |                |      |                |               |      |                |                |
| 27 |  |                                   |      |                |      |                |               |      |                |                |
| 28 |  |                                   |      |                |      |                |               |      |                |                |
| 29 |  |                                   |      |                |      |                |               |      |                |                |
| 30 |  | <b>Total (67 focus countries)</b> |      | <b>268,745</b> |      | <b>350,995</b> | <b>81,855</b> |      | <b>474,920</b> | <b>205,744</b> |
| 31 |  |                                   |      |                |      |                |               |      |                |                |
| 32 |  |                                   |      |                |      |                |               |      |                |                |
| 33 |  |                                   |      |                |      |                |               |      |                |                |
| 34 |  |                                   |      |                |      |                |               |      |                |                |
| 35 |  |                                   |      |                |      |                |               |      |                |                |
| 36 |  |                                   |      |                |      |                |               |      |                |                |
| 37 |  |                                   |      |                |      |                |               |      |                |                |
| 38 |  |                                   |      |                |      |                |               |      |                |                |
| 39 |  |                                   |      |                |      |                |               |      |                |                |
| 40 |  |                                   |      |                |      |                |               |      |                |                |
| 41 |  |                                   |      |                |      |                |               |      |                |                |
| 42 |  |                                   |      |                |      |                |               |      |                |                |
| 43 |  |                                   |      |                |      |                |               |      |                |                |
| 44 |  |                                   |      |                |      |                |               |      |                |                |
| 45 |  |                                   |      |                |      |                |               |      |                |                |
| 46 |  |                                   |      |                |      |                |               |      |                |                |
| 47 |  |                                   |      |                |      |                |               |      |                |                |

Table 4: Modern contraceptive prevalence rate (mCPR) and % demand satisfied (%SD) in 2012, 2020 and 2030 in 36 pledging countries

| Country                      | 2020 |             | 2030 |             |
|------------------------------|------|-------------|------|-------------|
|                              | mCPR | %SD         | mCPR | %SD         |
| <b>Sub-Sahara Africa(26)</b> |      |             |      |             |
| Benin                        | 19.9 | 34.8        | 34.9 | 54.1        |
| Burkina Faso                 | 28.2 | 48.1        | 43.2 | 65.3        |
| Burundi                      | 29.7 | 47.5        | 44.7 | 64.4        |
| Cameroon                     | 28.6 | 49.3        | 43.6 | 66.4        |
| Chad                         | 16.7 | 32.6        | 31.7 | 52.7        |
| Côte d'Ivoire                | 24.5 | 43.7        | 39.5 | 61.8        |
| DR Congo                     | 19.6 | 34.6        | 34.6 | 54.0        |
| Ethiopia                     | 42.3 | 65.1        | 57.3 | <b>78.7</b> |
| Ghana                        | 33.6 | 51.5        | 48.6 | 67.3        |
| Guinea                       | 16.6 | 33.0        | 31.6 | 53.1        |
| Liberia                      | 29.7 | 50.0        | 44.7 | 66.8        |
| Madagascar                   | 41.2 | 62.3        | 56.2 | <b>76.2</b> |
| Malawi                       | 62.9 | <b>78.2</b> | 77.9 | <b>86.6</b> |
| Mali                         | 21.9 | 43.7        | 36.9 | 62.5        |
| Mauritania                   | 23.5 | 41.9        | 38.5 | 60.3        |
| Mozambique                   | 23.3 | 46.7        | 38.3 | 65.2        |
| Niger                        | 24.2 | 51.0        | 39.2 | 69.2        |
| Nigeria                      | 22.8 | 45.8        | 37.8 | 64.3        |
| Rwanda                       | 57.6 | 73.9        | 72.6 | <b>83.6</b> |
| Senegal                      | 28.1 | 49.6        | 43.1 | 66.8        |
| Sierra Leone                 | 25.7 | 49.0        | 40.7 | 66.8        |
| South Sudan                  | 13.7 | 25.1        | 28.7 | 45.9        |
| Togo                         | 27.7 | 43.8        | 42.7 | 61.1        |
| Uganda                       | 37.8 | 55.5        | 52.8 | 70.3        |
| Tanzania                     | 41.3 | 64.7        | 56.3 | <b>78.5</b> |
| Zambia                       | 53.9 | 72.7        | 68.9 | <b>83.3</b> |
| <b>Other regions (10)</b>    |      |             |      |             |
| Afghanistan                  | 31.8 | 57.9        | 46.8 | 74.1        |
| Bangladesh                   | 71.3 | <b>83.6</b> | 86.3 | <b>89.8</b> |
| Haiti                        | 43.3 | 60.5        | 58.3 | 73.9        |
| India                        | 59.9 | <b>78.6</b> | 74.9 | <b>87.7</b> |
| Laos                         | 54.7 | 70.8        | 69.7 | <b>81.2</b> |
| Nepal                        | 55.2 | 72.8        | 70.2 | <b>83.1</b> |
| Pakistan                     | 38.1 | 58.5        | 53.1 | 73.2        |

|                 |      |             |      |             |
|-----------------|------|-------------|------|-------------|
| Philippines     | 49.1 | 63.4        | 64.1 | <b>75.3</b> |
| Solomon Islands | 39.4 | 74.2        | 54.4 | <b>88.6</b> |
| Viet Nam        | 70.5 | <b>77.8</b> | 85.5 | <b>84.2</b> |

Note: bold indicates reaching the target of satisfying 75% demand for family planning

For peer review only



1  
2  
3  
4  
5  
6  
7  
8  
9  
10  
11  
12  
13  
14  
15  
16  
17  
18  
19  
20  
21  
22  
23  
24  
25  
26  
27  
28  
29  
30  
31  
32  
33  
34  
35  
36  
37  
38  
39  
40  
41  
42  
43  
44  
45  
46  
47  
48  
49  
50  
51  
52  
53  
54  
55  
56  
57  
58  
59  
60

For peer review only

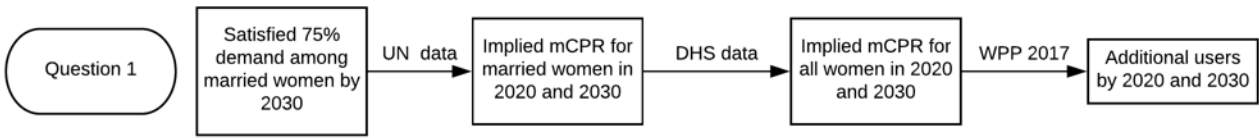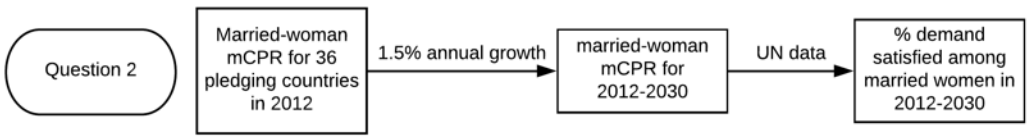

only

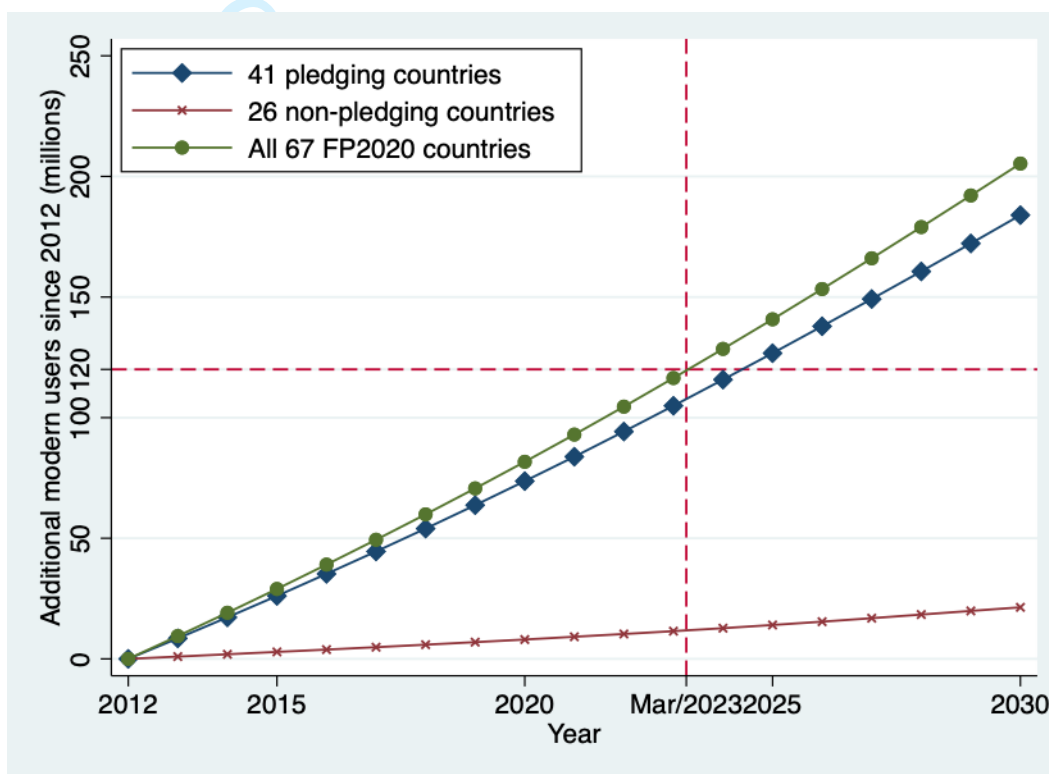

# BMJ Open

## Capitalizing on shared goals for family planning: a statistical assessment of the concordance of two global initiatives

|                                 |                                                                                                                                                                                                                                                                                                                     |
|---------------------------------|---------------------------------------------------------------------------------------------------------------------------------------------------------------------------------------------------------------------------------------------------------------------------------------------------------------------|
| Journal:                        | <i>BMJ Open</i>                                                                                                                                                                                                                                                                                                     |
| Manuscript ID                   | bmjopen-2019-031425.R1                                                                                                                                                                                                                                                                                              |
| Article Type:                   | Original research                                                                                                                                                                                                                                                                                                   |
| Date Submitted by the Author:   | 12-Aug-2019                                                                                                                                                                                                                                                                                                         |
| Complete List of Authors:       | Li, Qingfeng; Johns Hopkins Bloomberg School of Public Health, International Health<br>Rimon, Jose; Johns Hopkins Bloomberg School of Public Health, Population, Family and Reproductive Health<br>Ahmed, Saifuddin; Johns Hopkins University, Population, family and reproductive Health; Johns Hopkins University |
| <b>Primary Subject Heading</b>: | Global health                                                                                                                                                                                                                                                                                                       |
| Secondary Subject Heading:      | Public health                                                                                                                                                                                                                                                                                                       |
| Keywords:                       | Family planning, Global initiatives, FP2020, 75% satisfied demand                                                                                                                                                                                                                                                   |
|                                 |                                                                                                                                                                                                                                                                                                                     |

SCHOLARONE™  
Manuscripts

1  
2  
3 **Capitalizing on shared goals for family planning: a statistical assessment of the**  
4 **concordance of two global initiatives**  
5

6 Qingfeng Li<sup>1</sup>, Jose G. Rimon<sup>1</sup>, Saifuddin Ahmed<sup>1</sup>  
7

8  
9 <sup>1</sup>Bill & Melinda Gates Institute for Population and Reproductive Health  
10 Department of Population, Family and Reproductive Health  
11 Johns Hopkins Bloomberg School of Public Health, Baltimore, Maryland, United States of  
12 America  
13  
14  
15  
16  
17

18 **Corresponding author:**

19 Qingfeng Li, MHS, PhD  
20 Bloomberg School of Public Health  
21 Johns Hopkins University  
22 615 North Wolfe Street E8642  
23 Baltimore, MD 21205  
24 Tel:(410) 614-4890  
25 e-mail: [qli28@jhu.edu](mailto:qli28@jhu.edu)  
26  
27  
28  
29

30 **Keywords:** Family planning, Global initiatives, FP2020, 75% satisfied demand  
31  
32  
33  
34

35 **Word Count:** Abstract: 291; Body: 3555  
36  
37  
38  
39  
40  
41  
42  
43  
44  
45  
46  
47  
48  
49  
50  
51  
52  
53  
54  
55  
56  
57  
58  
59  
60

1  
2  
3 **Introduction:** Family planning is unique among health interventions in its breadth of health,  
4 development and economic benefits. The complexity of formulating effective strategies to  
5 promote women and girls' access to family planning calls for closer coordination of resources  
6 and attention from all stakeholders.  
7  
8  
9  
10

11  
12  
13  
14 **Objectives:** Our goal was to quantify the concordance of two global initiatives: Family Planning  
15 2020's adding 120 million modern contraceptive users by 2020 (proposed during The London  
16 Summit 2012 by Gates Foundation) and satisfying the 75% demand for modern contraceptives  
17 by 2030 (proposed by United States Agency for International Development). A demonstration of  
18 their concordance, or lack thereof, provides an understanding of the proposed quantitative goals  
19 and helps to formulate collective strategies.  
20  
21  
22  
23  
24  
25  
26  
27  
28  
29  
30

31 **Methods:** We applied fixed effects longitudinal models to assess the convergence of the two  
32 initiatives. The implications of success in one initiative on achieving the other are simulated to  
33 illustrate their shared goals. Publicly available data on contraceptive use, unmet need, and met  
34 need from national surveys are used. Extensive model validations were conducted to check and  
35 confirm models' predictive performance.  
36  
37  
38  
39  
40  
41  
42  
43  
44

45 **Results:** Our results show that the 75% satisfied demand initiative will reach 82 million  
46 additional modern users by 2020 and 120 million by early 2023. Following FP2020's proposed  
47 annual increase of modern contraceptive use, nine of the 41 commitment-making countries will  
48 reach the 75% target by 2020; another eight countries will do so by 2030. Extending FP2020's  
49  
50  
51  
52  
53  
54  
55  
56  
57  
58  
59  
60

1  
2  
3 proposed contraceptive growth to 2030 implies the achievement of the 75% target in less than  
4  
5 half (17) of the 41 commitment-making countries.  
6  
7  
8  
9

10 **Conclusions:** A closer coordination between major stakeholders in international family planning  
11  
12 may stimulate more efficient mobilization and utilization of global sources, which is urgently  
13  
14 needed to accelerate the progress toward satisfying women's need for family planning.  
15  
16  
17  
18

### 19 **Strengths of this study**

- 21 - This study is the first systematic comparison of two major global initiatives on family planning
- 22
- 23 - The estimations are based on rigorously developed and validated statistical models
- 24
- 25
- 26 - The findings provide new insights into the shared goals of the two initiatives and have important  
27  
28 policy implications  
29  
30

### 31 **Limitations of this study**

- 32
- 33 - Relying on secondary data restricts variable selection for the statistical models.
- 34
- 35
- 36 - The linear mCPR growth curve assumed in the study may not be accurate for each country.  
37  
38  
39  
40  
41  
42  
43  
44  
45  
46  
47  
48  
49  
50  
51  
52  
53  
54  
55  
56  
57  
58  
59  
60

## Introduction

Access to family planning is a critical component of reproductive rights and leads to multi-faceted benefits for women and their families. It is unique among health interventions in its breadth of health, development and economic benefits, such as reducing maternal and child mortality, empowering women and girls, and enhancing environmental sustainability.<sup>1,2</sup> The Lancet series on family planning in 2012 documented strong evidence of the extensive gains resulting from family planning. Ahmed and colleagues estimated that contraceptive use in 172 countries averted 272,040 maternal deaths in 2008, and satisfying unmet need for contraceptive methods could prevent another 104,000 deaths per year.<sup>2</sup> Cleland and colleagues made nearly identical estimates using a different methodology.<sup>3</sup> Additionally, Canning and Schultz evaluated the economic consequences of family planning, including increases in female labor force participation and proportion in paid employment.<sup>4</sup>

However, after reaching their global peak following the 1994 International Conference on Population and Development (ICPD) in Cairo, both financial support and political commitments for family planning have plateaued, and even declined in many countries, in the decade prior to 2012.<sup>1,5</sup> Consequently, progress towards providing access to contraception for women and girls in developing countries has been slow. On average, women in Sub-Saharan Africa continue to have more than five children.<sup>6</sup>

Compared with other public health interventions, family planning has two unique features that need special attention. First, due to cultural, religious, and political reasons, family planning is more controversial than many other public health issues.<sup>1</sup> Even the proponents of family

1  
2  
3 planning disagree with each other over what the primary aims should be. Some emphasize  
4  
5 ecological concerns, specifically the effect of fertility declines on population structure,  
6  
7 ecosystem, and economy. Others emphasize human rights concerns, promoting women's control  
8  
9 over their own reproduction.<sup>7</sup>  
10  
11  
12  
13

14  
15 Second, unlike other public health issues, such as reducing child mortality, the biomedical side  
16  
17 of family planning is well-established, with proven methods to space and limit pregnancies.  
18  
19 Where the successful implementation of family planning programs is concerned, it has been  
20  
21 established that a key element is the political issue of obtaining support from and forming a  
22  
23 broad coalition of elite groups.<sup>1,7</sup> This has proven successful in many countries, but remains  
24  
25 elusive in some, especially in Sub-Saharan Africa.  
26  
27  
28  
29  
30

31 The complexity of formulating effective strategies to promote women and girls' access to family  
32  
33 planning calls for closer coordination of resources and attention from all stakeholders. As noted  
34  
35 by Kim and Ammann (2004), a clear consensus on targets and priorities is indispensable for all  
36  
37 successful public projects in the modern era.<sup>8</sup>  
38  
39  
40  
41

42 During the past few years, two major family planning initiatives were launched. First, the  
43  
44 London Summit on Family Planning in July 2012, was convened by the United Kingdom's  
45  
46 Department for International Development (DFID) and the Bill & Melinda Gates Foundation  
47  
48 (BMGF). At the Summit, leaders proposed adding 120 million modern contraceptive users in the  
49  
50 world's 69 poorest countries by 2020.<sup>9</sup> The second initiative, led by the United States Agency for  
51  
52 International Development (USAID), proposed a target of satisfying 75% of the demand for  
53  
54  
55  
56  
57  
58  
59  
60



1  
2  
3 family planning with modern contraceptives by 2030.<sup>10,11</sup> This indicator of satisfied demand was  
4  
5 subsequently adopted in the Sustainable Development Goals.<sup>12</sup> The percent satisfied demand is  
6  
7 the proportion of women who use modern contraception divided by the total demand for family  
8  
9 planning, which is defined by adding the percentage of married or in-union women aged 15-49  
10  
11 who are using any contraception to the percentage of women with unmet need. Unmet need  
12  
13 refers to the proportion of women who want to stop or delay childbearing but are not using any  
14  
15 method of contraception. Following Fabic et al., in the present study, we only consider the  
16  
17 demand for FP among married or in-union women aged 15-49 years.<sup>10</sup>  
18  
19  
20  
21  
22  
23

24 FP2020 and 75% satisfied demand are two ambitious family planning initiatives. A recent  
25  
26 assessment of FP2020 found that progress has been made with diverse country-level growth  
27  
28 rates, but overall the initiative is below the proposed trajectory.<sup>13</sup> Given the scale of the  
29  
30 initiatives and the number of partners involved in the family planning field, improved  
31  
32 coordination, and a broader coalition is necessary to achieve the goals. The objective of this  
33  
34 study is to assess the concordance of these two initiatives through estimating the implication of  
35  
36 accomplishing one target on the other. A demonstration of their consistency, or the lack thereof,  
37  
38 provides a better understanding of the proposed quantitative goals and helps to formulate  
39  
40 collective strategies.  
41  
42  
43  
44  
45  
46

## 47 **Methods**

48  
49 The contraceptive prevalence data are from the United Nations Development Programme  
50  
51 (UNDP) survey-based estimates of the percentage of married or in-union women aged 15-49  
52  
53 using any modern contraceptive method.<sup>14</sup> The database includes estimates of modern  
54  
55  
56  
57  
58  
59  
60

1  
2  
3 contraceptive prevalence rate (mCPR) and % satisfied demand collected from 466 surveys in 142  
4  
5 countries from 1986 to 2016. Among the 70 FP2020 focus countries (South Africa joined the  
6  
7 FP2020 Initiative after the London Summit), three countries (Djibouti, Somalia, and Western  
8  
9 Sahara) do not have any survey-based estimates of mCPR and % satisfied demand and therefore  
10  
11 are excluded from the present study. In the end, our study is based on 67 FP2020 countries, with  
12  
13 a focus on the 41 countries that made a commitment to the FP2020 Initiative (defined as  
14  
15 commitment-making countries; see [www.familyplanning2020.org](http://www.familyplanning2020.org) for a full and up-to-date list;  
16  
17 accessed on February 20, 2019).  
18  
19  
20  
21  
22  
23

24 The target measures discussed in this study are closely correlated by definition. Let P denote the  
25  
26 total number of women aged 15-49 years, N denote the number of women who express a need  
27  
28 for family planning, C denote the number of modern contraceptive users, T denote the number of  
29  
30 modern and traditional contraceptive users, U denote the number with unmet need for family  
31  
32 planning. Then we have  $mCPR = C/P$ ,  $\% \text{ unmet need} = U/P$ , and  $\% \text{ met need (or satisfied}$   
33  
34  $\text{demand}) = C/N$ .  
35  
36  
37

$$38 \quad \% \text{ satisfied demand} = \frac{C}{N} = \frac{C}{T + U} = \frac{mCPR}{CPR + \% \text{ unmet need}}$$

39  
40  
41 An increase in C implies higher mCPR, but it does not necessarily increase % satisfied demand.  
42  
43 The relationship between the indicators becomes complex in other scenarios, such as when more  
44  
45 women express a need for family planning. This will decrease the % met need without affecting  
46  
47 mCPR. The congruence, and lack of it, has been observed in FP2020 countries. From 2012 to  
48  
49 2017, the high growth of mCPR has driven a nine-percentage point increase in demand satisfied  
50  
51 in Eastern and Southern Africa. During the same period, Central and West Africa experienced  
52  
53 comparable mCPR growth, but that was accompanied by increasing levels of unmet need. These  
54  
55  
56  
57  
58  
59  
60

1  
2  
3 are the results of a complex dynamic involving both fertility intentions and available family  
4  
5 planning services. As a result, our subsequent empirical analyses will be based on probabilistic  
6  
7 statistical regression rather than deterministic mathematical relationships.  
8  
9

10  
11  
12 Another complicating factor is that FP2020 counts all women, irrespective of their marital status,  
13  
14 while the 75% target only covers married or in-union women. Although subsequent debates  
15  
16 consider expanding the satisfied demand target to all women, no consensus has been reached,  
17  
18 and therefore we will use the original statement of the 75% target. The difference in  
19  
20 denominators will be dealt with in our statistical models.  
21  
22  
23  
24  
25

26 The congruence between FP2020 and 75% satisfied demand targets requires a bi-directional  
27  
28 assessment. We estimated the implications of achieving one of them on the other. Specifically,  
29  
30 the study attempts to answer the following two questions: (1) how many additional users will be  
31  
32 added following the 75% satisfied demand target; (2): what percentage of demand will be  
33  
34 satisfied in 41 commitment-making countries assuming an annual increase of 1.4 percentage  
35  
36 points from 2012 until 2030? Annual growth of 1.4% is the overall target proposed by the  
37  
38 London Summit on Family Planning Metrics Group across all FP2020 focus countries<sup>9</sup>. Overall  
39  
40 annual growth of 0.7 percentage points was observed across the world's 69 poorest countries  
41  
42 before 2012. Brown et al. estimated that doubling the annual growth to 1.4 would add 120  
43  
44 million modern contraceptive users by 2020. The target growth rate is considered an aspirational  
45  
46 yet achievable goal assuming the resources and leadership around current family planning  
47  
48 programs may be collectively mobilized. These two assessments are conducted separately, albeit  
49  
50 employing a similar methodology (Figure 1).  
51  
52  
53  
54  
55  
56  
57  
58  
59  
60

<Figure 1 about here>

There are three steps to answer the first research question. The first step is to estimate the necessary married-woman mCPR to satisfy 75% demand with modern methods by 2030. Among the 41 commitment-making countries, five FP2020 commitment-making countries had already reached the 75% satisfied demand goal in their most recent surveys (Table 1). It is reasonable to assume that maintaining at least 75% satisfied demand by 2030 is the goal in those countries. We assume the mCPR and % satisfied demand will remain at their most recent observed level until 2030.

<Table 1 about here>

For the other 36 countries, the percentage of demand satisfied with modern methods is assumed to reach 75% in 2030. Then we employ the following country-level fixed effects longitudinal model to estimate the required mCPR for the assumed 75% satisfied demand.

$$y_{it} = \beta_0 + \beta_1 x_{it} + \beta_2 x_{it}^2 + \alpha_i + \varepsilon_{it} \quad (1)$$

where  $y_{it}$  denote the mCPR for country  $i$  in time  $t$ ;  $x_{it}$  denotes the % satisfied demand for country  $i$  in time  $t$ ;  $\alpha_i$  denotes the time-invariant unobserved fixed effects for country  $i$ ;  $\varepsilon_{it}$  denotes the error term. The mode is chosen from several options due to its best predictive performance. The model is first fitted using survey-based data compiled by the United Nations.

1  
2  
3 The Least Squares Dummy Variable (LSDV) method is used in the model estimation<sup>15</sup>. This  
4 approach explicitly provides the coefficients of the country dummy, which is required in  
5 predicting the mCPR for the assumed 75% satisfied demand in 2030. Then with the estimated  
6 coefficients and country-level fixed effects, we estimate mCPR for the assumed 75% satisfied  
7 demand.  
8  
9  
10  
11  
12  
13  
14  
15  
16

17 The second step is to convert the married-woman mCPR estimated in step 1 to all-woman  
18 mCPR. Two hundred sixty-two DHS surveys based on samples of all women of reproductive  
19 ages were conducted from 1990 to 2016 in 85 countries. We use the following fixed effects  
20 longitudinal model to estimate all-woman mCPR from married mCPR  
21  
22  
23  
24  
25  
26  
27

$$28 \quad a_i = \theta_0 + \theta_1 m_i + v_i + \epsilon_{it} \quad (2)$$

29  
30  
31  
32  
33 where  $a_i$  and  $m_i$  denote the all-woman and married mCPR in survey  $i$ ;  $v_i$  denotes region (SSA  
34 vs. non-SSA) level fixed effects. We use region level instead of country-level fixed effects  
35 because a model with country-level fixed effects cannot be used for prediction in FP2020  
36 countries without a DHS survey.  
37  
38  
39  
40  
41  
42  
43  
44

45 In the third step, we assume all-woman mCPR will increase linearly from the level in the last  
46 survey to the level estimated for 2030 in step 2. Using the number of women of reproductive age  
47 obtained from World Population Prospects 2017, we calculate the number of modern  
48 contraceptive users in the 67 FP2020 focus countries.<sup>16</sup>  
49  
50  
51  
52  
53  
54  
55  
56  
57

1  
2  
3 The second research question is answered similarly in three steps (Figure 1). We first estimate  
4 the baseline, i.e., all-woman mCPR in 2012. Our principle is to rely on the survey-based  
5 estimates as much as possible. As mentioned above, 5 of the 41 FP2020 commitment-making  
6 countries had already reached the 75% satisfied demand goal in their most recent surveys, and  
7 therefore are excluded from this investigation. Among the other 36 commitment-making  
8 countries, 10 conducted a survey in 2012. For those 19 countries that have conducted surveys  
9 both before and after 2012, we use the two surveys before and after 2012 to linearly interpolate  
10 the mCPR for 2012. For the other 7 countries that only have surveys conducted before 2012, we  
11 used the last survey-based estimate for 2012.  
12  
13  
14  
15  
16  
17  
18  
19  
20  
21  
22  
23  
24  
25

26 Then we impose a 1.4% annual increase in all-woman mCPR from 2012 until 2030. Finally, we  
27 predict the % satisfied demand associated with the calculated levels of all-woman mCPR for  
28 2012-2030 based on a fixed effects longitudinal model similar to Equation (1), but moving %  
29 satisfied demand to the left-hand side and including mCPR and its squared term in the right-hand  
30 side.  
31  
32  
33  
34  
35  
36  
37  
38  
39

#### 40 **Patient and Public Involvement**

41 The study does not involve patients or the public.  
42  
43  
44  
45  
46

#### 47 **Results**

48 All three fixed effects longitudinal models fit the data quite well, indicating excellent predictive  
49 performance (Table 2). Using 466 survey-based estimates, the adjusted R-squared of the model  
50 regressing married-woman mCPR on % satisfied demand and a country dummy is above 0.98,  
51  
52  
53  
54  
55  
56  
57  
58  
59  
60

1  
2  
3 meaning that less than 2% of the variations in married-woman mCPR cannot be explained by the  
4 model (Model 1). As a result, the estimated married-woman mCPR based on the assumed 75%  
5 satisfied demand should be highly accurate and reliable. The adjusted R-squared of 0.97 in  
6 Model 2 also indicates accurate conversion from married- to all-woman mCPR. Model 3 that  
7 regresses % satisfied demand on married-woman mCPR also performed well (adjusted R-  
8 squared 0.97).  
9  
10  
11  
12  
13  
14  
15  
16  
17  
18

19 <Table 2 about here>  
20  
21  
22  
23

24 Achieving the 75% satisfied demand by 2030 goal means a gain of approximately 82 million  
25 additional users in these 67 FP2020 countries from 2012 to 2020, which is about 68% of the 120  
26 million proposed by the FP2020 Initiative (Table 3). From 2012 to 2020, these 41 commitment-  
27 making countries will contribute 74 million additional users while these 26 non-commitment-  
28 making FP2020 countries contribute 8 million. If the 67 countries continue the mCPR growth  
29 rate implied by the 75% satisfied demand initiative, the goal of adding 120 million modern  
30 contraceptive users will be achieved in early 2023 (Figure 2). By 2030, there will be 184 and 21  
31 million additional users in commitment-making and non-commitment-making countries,  
32 respectively, making a total number of 206 additional modern contraceptive users in these 67  
33 FP2020 countries.  
34  
35  
36  
37  
38  
39  
40  
41  
42  
43  
44  
45  
46  
47  
48

49 <Table 3 about here>  
50  
51  
52  
53  
54  
55  
56  
57  
58  
59  
60

1  
2  
3 Five of the 41 FP2020 commitment-making countries (three in sub-Saharan Africa) have already  
4 satisfied 75% or more of the contraceptive demand, according to their last survey. Among the  
5  
6 other 36 commitment-making countries, only four additional countries (Bangladesh, India,  
7  
8 Malawi, and Vietnam) will reach that target by 2020, following FP2020's proposed 1.4% annual  
9  
10 increase in mCPR (Table 4). Another eight countries (Ethiopia, Laos, Madagascar, Nepal,  
11  
12  
13 Rwanda, Solomon Islands, Tanzania, and Zambia) will do so by 2030. Disaggregated by region,  
14  
15 the situation is more challenging in sub-Saharan Africa, where only one (Malawi) of the 26  
16  
17 commitment-making countries will reach the 75% target by 2020, and another five countries  
18  
19 (Ethiopia, Madagascar, Rwanda, Tanzania, and Zambia) will do so by 2030. Adding those three  
20  
21 countries that had already reached the target in their most recent surveys, less than one third (9)  
22  
23 of the 29 commitment-making countries in this region will satisfy 75% demand for family  
24  
25 planning by 2030. In the other regions, five countries will achieve the target by 2020, and  
26  
27 another three will do so by 2030. Those eight target-achieving countries represent two-thirds of  
28  
29 the 12 non-SSA commitment-making countries.  
30  
31  
32  
33  
34  
35  
36  
37

38 In sum, assuming FP2020's proposed annual growth rate in mCPR, the % satisfied will reach  
39  
40 75% in less than half (17) of the 41 FP2020 commitment-making countries  
41  
42  
43  
44

45 <Table 4 about here>  
46  
47  
48

## 49 Discussion

50  
51 The contribution of this study is an improved understanding of the convergence of targets of two  
52  
53 global family planning initiatives: FP2020's adding 120 modern contraceptive users by 2020 in  
54  
55  
56  
57



1  
2  
3 69 of the world's poorest countries and USAID's satisfying 75% demand for family planning  
4  
5 with modern contraceptives. We estimate and discuss the implication of reaching one target on  
6  
7 the other. The shared goal may facilitate building a broad coalition to promote family planning in  
8  
9 the developing world. These two initiatives represent the objectives of two major donors to  
10  
11 family planning.<sup>17</sup> The % satisfied demand has also been adopted as an indicator in the  
12  
13 Sustainable Development Goals. Due to their different features and advantages, mCPR (and  
14  
15 number of users) and % satisfied demand will continue coexisting in the international agenda for  
16  
17 family planning. Despite their theoretical correlation, the empirical relation between the two  
18  
19 indicators depends on other context-specific factors, such as demand generation and changes in  
20  
21 fertility desire. As a result, an assessment of the empirical correlation between the two indicators  
22  
23 has sustaining policy implications. A consensus goal is critical to building a broad coalition to  
24  
25 collectively and effectively mobilize financial and political resources and capture global  
26  
27 attention.  
28  
29  
30  
31  
32  
33  
34

35 Our results show that the two initiatives move towards the same goal of promoting access to  
36  
37 family planning for women and girls. Overall, both the 75% satisfied demand and the FP2020  
38  
39 goal are ambitious. Achieving the 75% satisfied demand goal by 2030 implies that 82 million or  
40  
41 68% of the 120-million target users will be added by 2020 in 67 FP2020 focus countries. The  
42  
43 target of 120 million will be achieved by 2023, only three years later than the FP2020 deadline.  
44  
45 On the other hand, achieving a 1.4% annual increase in all-woman mCPR will enable only 17 of  
46  
47 the 41 commitment-making countries to attain the goal of 75% satisfied demand by 2030. The  
48  
49 overall assessment should not mask the across-country variations. In some countries it is more  
50  
51 plausible to achieve the FP2020's proposed annual increase of 1.4 percentage points than  
52  
53  
54  
55  
56  
57  
58  
59  
60

1  
2  
3 satisfying the 75% demand by 2030. Some other countries, however, have satisfied 75% demand  
4  
5 or will do so by 2030 with an annual mCPR increase below 1.4 percentage points.  
6  
7  
8  
9

10 The simulated implications of achieving one target on the other have several policy implications,  
11  
12 which are urgently needed as donors and stakeholders are debating about the post-FP2020 plan.  
13

14 First, multiple measures will continue coexisting in international family planning. The FP2020  
15  
16 Core Group of which the Bill and Melinda Gates Foundation, United Kingdom's Department for  
17  
18 International Development (DFID), USAID and United Nations Population Fund (UNFPA) are  
19  
20 active may renew their commitment to adding modern contraceptive users beyond FP2020 to the  
21  
22 FP2030 deadline. The % satisfied demand has been adopted as an indicator as SDG 3.7.1. The  
23  
24 75% benchmark is being used as a proxy for the minimum definition of "universal access to  
25  
26 reproductive health" in terms of contraceptive use (SDG 3). Methodologically, our models for  
27  
28 assessing the congruence of the two measures could be replicated as the FP2020 movement sets  
29  
30 its goals for FP2030.  
31  
32  
33  
34  
35  
36  
37

38 Second, our exercise sheds light on the choice between aspirational and realistic target-setting  
39  
40 approaches. The findings show that 75% satisfied demand can be viewed in three settings: 1)  
41  
42 countries who have already achieved the goal but whose plans involve increasing the percentage  
43  
44 higher than the 75% benchmark (e.g., Indonesia, Myanmar, Kenya, South Africa, Zimbabwe);  
45  
46 2) countries which are projected to likely reach the goal by 2020 and 2030; and 3) countries  
47  
48 which will remain below the goal (21 of 41 commitment-making countries). With only one year  
49  
50 left before its deadline, FP2020 has contributed to the mobilization of global resources for family  
51  
52  
53  
54  
55  
56  
57  
58  
59  
60

1  
2  
3 planning and has shown progress against the goal but not at the trajectory to reach 120 million  
4  
5 more women and girls by 2020.  
6  
7  
8  
9

10 The third policy implication is for the choice between global and national targets. All countries  
11 in our exercise belong to low-income countries, but they still demonstrate massive diversity in  
12 terms of mCPR, desired and realized fertility, and population age structure. When setting targets  
13 in the future, donors and stakeholders need to strike a balance between simplification (global  
14 target as in FP2020) and customization (country-specific targets as in 75% satisfied demand).  
15  
16  
17  
18  
19  
20  
21  
22  
23

24 The last policy implication is on SDG. Although % satisfied demand has been adopted as an  
25 indicator (SDG 3.7.1), it has not been associated with quantitative goals. The same situation  
26 occurred to Target 5b of Millennium Development Goals (MDGs): “Achieve, by 2015, universal  
27 access to reproductive health”. Several studies argued that clear, measurable goals can be a focal  
28 point for coalescing political support for action.<sup>9</sup> Reflecting on the lag in substantively  
29 integrating family planning into the MDGs, FP2020 proposed a quantifiable target of adding 120  
30 million modern contraceptive users by 2020. Adopting the target of 75% satisfied demand in  
31 SDG may help mobilize and guide resource allocation and provide a benchmark for program  
32 advocacy. Per our simulation results, the target is achievable in certain countries and aspirational  
33 in others.  
34  
35  
36  
37  
38  
39  
40  
41  
42  
43  
44  
45  
46  
47  
48

49 The study is not without limitations. First, despite the highly satisfactory model fit, our  
50 regressions could be theoretically improved by including other factors such as calendar time. We  
51 did not include year as a covariate because its coefficient reflects not only temporal effects but  
52  
53  
54  
55  
56  
57  
58  
59  
60

1  
2  
3 also the changing composition of countries in the database. For example, the earliest DHS  
4 surveys were mostly in Africa, while Asia was added later. So, the absence of calendar time in  
5 the model is a limitation with the database rather than our methodology. Since we are mainly  
6 interested in the predictive performance of the model, measured by the adjusted R-squared, and  
7 adding year as a covariate changed the adjusted R-squared by less than 1 percentage point, our  
8 final model did not consider calendar time. The second limitation is the linear assumption on  
9 mCPR growth. Other growth curves (such as S-shaped or logistic) may be more accurate in  
10 many countries. The 67 FP2020 countries are in different stages of mCPR growth, some  
11 experiencing a convex trajectory and some a concave trajectory. Fully accounting for country-  
12 specific curves will likely make the statistical models much more complex and less robust. We  
13 believe a linear trajectory provides an acceptable approximation for the mixture of convex and  
14 concave trajectories. Consequently, the global estimates presented in the study may not be  
15 substantially affected by the assumed linearity.  
16  
17  
18  
19  
20  
21  
22  
23  
24  
25  
26  
27  
28  
29  
30  
31  
32  
33  
34

35 As repeatedly emphasized in the London Summit document, setting a quantitative target should  
36 not cause concern among those firmly committed to sexual and reproductive health and rights  
37 because all interventions will have women's rights at the center of their implementation efforts.  
38 Our assessment in this study of the congruence of major, articulated family planning initiatives  
39 aims to unite international communities into collective actions that secure women's and girls'  
40 access to effective contraceptive methods.  
41  
42  
43  
44  
45  
46  
47  
48  
49  
50

51 **Author contributions:** QL, SA, and JR devised the study and wrote the article. QL compiled the  
52 data and led the statistical modeling and analysis.  
53  
54  
55  
56  
57

**Disclosure statement:** No potential conflict of interest was reported by the authors.

**Ethics and consent:** This study only uses publicly available secondary data and does not involve any participants. Therefore, ethical approval and participant consent are not required.

**Funding:** Bill and Melinda Gates Foundation

## References

1. Cleland J, Bernstein S, Ezeh A, Faundes A, Glasier A, Innis J. Family planning: the unfinished agenda. *The Lancet* 2006; **368**(9549): 1810-27.
2. Ahmed S, Li Q, Liu L, Tsui AO. Maternal deaths averted by contraceptive use: an analysis of 172 countries. *The Lancet* 2012; **380**(9837): 111-25.
3. Cleland J, Conde-Agudelo A, Peterson H, Ross J, Tsui A. Contraception and health. *Lancet (London, England)* 2012; **380**(9837): 149-56.
4. Canning D, Schultz TP. The economic consequences of reproductive health and family planning. *Lancet (London, England)* 2012; **380**(9837): 165-71.
5. Cohen SA. London summit puts family planning back on the agenda, offers new lease on life for millions of women and girls. *Guttmacher Policy Review* 2012; **15**(3): 20-4.
6. Ezeh AC, Bongaarts J, Mberu B. Global population trends and policy options. *Lancet (London, England)* 2012; **380**(9837): 142-8.
7. Shiffman J, Quissell K. Family planning: a political issue. *Lancet (London, England)* 2012; **380**(9837): 181-5.
8. Kim JY, Ammann A. Is the "3 by 5" Initiative the Best Approach to Tackling the HIV Pandemic? *PLoS Medicine* 2004; **1**(2): e37.
9. Brown W, Druce N, Bunting J, et al. Developing the "120 by 20" goal for the Global FP2020 Initiative. *Stud Fam Plann* 2014; **45**(1): 73-84.
10. Fabic MS, Choi Y, Bongaarts J, et al. Meeting demand for family planning within a generation: the post-2015 agenda. *Lancet (London, England)* 2015; **385**(9981): 1928-31.
11. Choi Y, Short Fabic M. Monitoring Progress in Equality for the Sustainable Development Goals: A Case Study of Meeting Demand for Family Planning. *Global health, science and practice* 2018; **6**(2): 390-401.
12. United Nations General Assembly. Sustainable Development Goals 3. <https://sustainabledevelopment.un.org/sdg3> (accessed August 9 2019).
13. Cahill N, Sonneveldt E, Stover J, et al. Modern contraceptive use, unmet need, and demand satisfied among women of reproductive age who are married or in a union in the focus countries of the Family Planning 2020 initiative: a systematic analysis using the Family Planning Estimation Tool. *Lancet (London, England)* 2017.
14. United Nations DoEaSA, Population Division (2017). World Contraceptive Use 2017 (POP/DB/CP/Rev2017).
15. Greene WH. Econometric analysis: Prentice Hall; 2011.
16. United Nations DoEaSA, Population Division, W. World Population Prospects: The 2017 Revision, Key Findings and Advance Tables. Working Paper No. ESA/P/WP/248. 2017.
17. IHME. Financing Global Health 2014: Shifts in Funding as the MDG Era Closes. Seattle, WA: IHME; 2015.

1  
2  
3  
4  
5  
6  
7  
8  
9  
10  
11  
12  
13  
14  
15  
16  
17  
18  
19  
20  
21  
22  
23  
24  
25  
26  
27  
28  
29  
30  
31  
32  
33  
34  
35  
36  
37  
38  
39  
40  
41  
42  
43  
44  
45  
46  
47  
48  
49  
50  
51  
52  
53  
54  
55  
56  
57  
58  
59  
60

Figure 1: Analytical flowchart for the two research questions

Figure 2: Number of additional modern contraceptive users in 41 commitment-making and 26 non-commitment-making countries assuming the trajectory of satisfying 75% demand by 2030

For peer review only

Table 1: Modern contraceptive prevalence rate (mCPR) in 5 commitment-making countries where % demand satisfied exceeded 75% in the last survey

| Country      | Region  | Survey date | mCPR | % demand satisfied |
|--------------|---------|-------------|------|--------------------|
| Myanmar      | Non-SSA | 2015-16     | 51.3 | 75.0               |
| Kenya        | SSA     | 2015        | 62.6 | 76.2               |
| Indonesia    | Non-SSA | 2015-16     | 59.5 | 78.8               |
| South Africa | SSA     | 2003-04     | 59.8 | 81.1               |
| Zimbabwe     | SSA     | 2015        | 65.8 | 85.2               |

Notes: SSA denotes sub-Saharan Africa; non-SSA includes all other regions

Table 2: Goodness of fit of the fixed effects longitudinal models

|                      | Model 1                                      | Model 2                     | Model 3                          |
|----------------------|----------------------------------------------|-----------------------------|----------------------------------|
| <b>Outcome</b>       | Married mCPR                                 | All-woman mCPR              | % satisfied demand               |
| <b>Covariates</b>    | % satisfied demand<br>(% satisfied demand)^2 | Married mCPR                | Married mCPR<br>(married mCPR)^2 |
| <b>Fixed effects</b> | Country level                                | Region (SSA; non-SSA) level | Country level                    |
| <b>Sample size</b>   | 466                                          | 262                         | 466                              |
| <b>R-squared</b>     | 0.98                                         | 0.91                        | 0.97                             |



Table 3: Modern contraceptive prevalence rate (mCPR), modern contraceptive users (thousand), and added users since 2012 (thousand) in 41 commitment-making and 26 non-commitment-making countries under FP2020: assuming the achievement of 75% satisfied demand by 2030

| Country                                 | 2012 |         | 2020 |         |             | 2030 |         |             |
|-----------------------------------------|------|---------|------|---------|-------------|------|---------|-------------|
|                                         | mCPR | Users   | mCPR | Users   | Added users | mCPR | Users   | Added users |
| <b>Commitment-making countries (41)</b> |      |         |      |         |             |      |         |             |
| Afghanistan                             | 10.4 | 691     | 22.7 | 2,065   | 1,374       | 38.1 | 4,645   | 3,954       |
| Bangladesh                              | 41.2 | 17,800  | 42.4 | 20,200  | 2,366       | 43.8 | 22,200  | 4,369       |
| Benin                                   | 7.0  | 158     | 22.0 | 636     | 478         | 40.9 | 1,570   | 1,412       |
| Burkina Faso                            | 13.5 | 515     | 25.5 | 1,249   | 734         | 40.5 | 2,704   | 2,189       |
| Burundi                                 | 16.7 | 371     | 27.5 | 768     | 397         | 41.0 | 1,599   | 1,229       |
| Cameroon                                | 14.2 | 708     | 25.8 | 1,621   | 913         | 40.3 | 3,362   | 2,655       |
| Chad                                    | 0    | 0       | 17.2 | 651     | 651         | 39.3 | 2,052   | 2,052       |
| Côte d'Ivoire                           | 11.5 | 566     | 24.2 | 1,509   | 943         | 39.9 | 3,277   | 2,711       |
| DR Congo                                | 3.9  | 594     | 20.3 | 4,066   | 3,472       | 40.8 | 11,600  | 11,000      |
| Ethiopia                                | 26.2 | 5,677   | 32.6 | 9,285   | 3,608       | 40.5 | 15,100  | 9,398       |
| Ghana                                   | 14.3 | 935     | 26.9 | 2,093   | 1,158       | 42.6 | 4,080   | 3,145       |
| Guinea                                  | 4.8  | 124     | 20.1 | 655     | 531         | 39.2 | 1,711   | 1,588       |
| Haiti                                   | 24.5 | 663     | 32.9 | 1,009   | 346         | 43.3 | 1,493   | 829         |
| India                                   | 35.7 | 115,000 | 38.5 | 138,000 | 22,600      | 41.9 | 162,000 | 46,700      |
| Indonesia                               | 45.7 | 31,000  | 45.7 | 32,900  | 1,904       | 45.7 | 34,600  | 3,521       |
| Kenya                                   | 47.1 | 5,076   | 47.7 | 6,592   | 1,516       | 48.5 | 8,575   | 3,499       |
| Laos                                    | 33.4 | 570     | 38.1 | 742     | 171         | 44.1 | 972     | 401         |
| Liberia                                 | 14.2 | 139     | 25.9 | 318     | 179         | 40.6 | 649     | 510         |
| Madagascar                              | 26.2 | 1,395   | 32.8 | 2,246   | 851         | 41.0 | 3,674   | 2,280       |
| Malawi                                  | 45.4 | 1,696   | 44.7 | 2,218   | 522         | 44.0 | 2,984   | 1,289       |
| Mali                                    | 7.6  | 268     | 21.2 | 962     | 694         | 38.1 | 2,427   | 2,160       |
| Mauritania                              | 7.6  | 70      | 22.2 | 259     | 189         | 40.5 | 610     | 540         |

|    |  |                              |      |                |      |                |               |      |                |                |
|----|--|------------------------------|------|----------------|------|----------------|---------------|------|----------------|----------------|
| 1  |  |                              |      |                |      |                |               |      |                |                |
| 2  |  |                              |      |                |      |                |               |      |                |                |
| 3  |  | Mozambique                   | 11.3 | 676            | 23.3 | 1,792          | 1,115         | 38.2 | 4,002          | 3,325          |
| 4  |  | Myanmar                      | 39.5 | 5,503          | 39.5 | 5,956          | 453           | 39.5 | 6,197          | 694            |
| 5  |  | Nepal                        | 34.0 | 2,504          | 38.1 | 3,293          | 789           | 43.4 | 4,078          | 1,574          |
| 6  |  | Niger                        | 5.2  | 192            | 19.2 | 971            | 778           | 36.6 | 2,781          | 2,588          |
| 7  |  | Nigeria                      | 6.2  | 2,364          | 20.5 | 9,773          | 7,409         | 38.5 | 24,200         | 21,900         |
| 8  |  | Pakistan                     | 20.0 | 8,935          | 29.5 | 15,400         | 6,475         | 41.3 | 26,100         | 17,100         |
| 9  |  | Philippines                  | 28.1 | 7,022          | 35.8 | 10,100         | 3,100         | 45.5 | 14,700         | 7,664          |
| 10 |  | Rwanda                       | 36.1 | 974            | 39.2 | 1,326          | 353           | 43.1 | 1,880          | 906            |
| 11 |  | Senegal                      | 12.8 | 429            | 24.7 | 1,040          | 611           | 39.6 | 2,217          | 1,787          |
| 12 |  | Sierra Leone                 | 11.6 | 188            | 23.7 | 479            | 291           | 38.8 | 997            | 809            |
| 13 |  | Solomon Islands              | 24.1 | 33             | 28.0 | 45             | 13            | 32.7 | 64             | 31             |
| 14 |  | South Africa                 | 46.4 | 6,715          | 46.4 | 7,366          | 651           | 46.4 | 8,067          | 1,352          |
| 15 |  | South Sudan                  | 6.3  | 160            | 21.2 | 697            | 537           | 39.9 | 1,715          | 1,555          |
| 16 |  | Togo                         | 11.8 | 195            | 25.1 | 516            | 322           | 41.7 | 1,109          | 915            |
| 17 |  | Uganda                       | 20.5 | 1,652          | 30.7 | 3,355          | 1,703         | 43.4 | 6,715          | 5,062          |
| 18 |  | Tanzania                     | 21.8 | 2,483          | 30.1 | 4,459          | 1,976         | 40.4 | 8,243          | 5,760          |
| 19 |  | Viet Nam                     | 43.4 | 11,200         | 45.8 | 11,900         | 686           | 48.8 | 12,600         | 1,401          |
| 20 |  | Zambia                       | 34.3 | 1,176          | 38.0 | 1,731          | 555           | 42.7 | 2,627          | 1,451          |
| 21 |  | Zimbabwe                     | 50.9 | 1,944          | 50.9 | 2,366          | 422           | 50.9 | 3,010          | 1,066          |
| 22 |  | <b>Subtotal</b>              |      | <b>238,350</b> |      | <b>312,597</b> | <b>73,836</b> |      | <b>423,176</b> | <b>184,372</b> |
| 23 |  |                              |      |                |      |                |               |      |                |                |
| 24 |  |                              |      |                |      |                |               |      |                |                |
| 25 |  |                              |      |                |      |                |               |      |                |                |
| 26 |  |                              |      |                |      |                |               |      |                |                |
| 27 |  |                              |      |                |      |                |               |      |                |                |
| 28 |  |                              |      |                |      |                |               |      |                |                |
| 29 |  |                              |      |                |      |                |               |      |                |                |
| 30 |  |                              |      |                |      |                |               |      |                |                |
| 31 |  | <b>Non-commitment-making</b> |      |                |      |                |               |      |                |                |
| 32 |  | <b>countries (26)</b>        |      |                |      |                |               |      |                |                |
| 33 |  |                              |      |                |      |                |               |      |                |                |
| 34 |  | Bhutan                       | 50.2 | 101            | 50.2 | 114            | 14            | 50.2 | 124            | 23             |
| 35 |  | Bolivia                      | 30.5 | 788            | 37.6 | 1,129          | 341           | 46.6 | 1,590          | 801            |
| 36 |  | Cambodia                     | 28.5 | 1,159          | 35.1 | 1,581          | 422           | 43.3 | 2,281          | 1,121          |
| 37 |  | Central African Republic     | 12.7 | 133            | 24.7 | 292            | 158           | 39.7 | 627            | 493            |
| 38 |  | Comoros                      | 12.0 | 21             | 25.3 | 54             | 33            | 41.9 | 114            | 92             |
| 39 |  | Congo                        | 10.9 | 120            | 24.9 | 334            | 214           | 42.3 | 755            | 635            |
| 40 |  |                              |      |                |      |                |               |      |                |                |
| 41 |  |                              |      |                |      |                |               |      |                |                |
| 42 |  |                              |      |                |      |                |               |      |                |                |
| 43 |  |                              |      |                |      |                |               |      |                |                |
| 44 |  |                              |      |                |      |                |               |      |                |                |
| 45 |  |                              |      |                |      |                |               |      |                |                |
| 46 |  |                              |      |                |      |                |               |      |                |                |
| 47 |  |                              |      |                |      |                |               |      |                |                |

|    |  |                                   |      |                |      |                |               |      |                |                |
|----|--|-----------------------------------|------|----------------|------|----------------|---------------|------|----------------|----------------|
| 1  |  |                                   |      |                |      |                |               |      |                |                |
| 2  |  |                                   |      |                |      |                |               |      |                |                |
| 3  |  |                                   |      |                |      |                |               |      |                |                |
| 4  |  | Egypt                             | 43.8 | 9,961          | 43.8 | 11,200         | 1,256         | 43.8 | 13,200         | 3,262          |
| 5  |  | Eritrea                           | 9.9  | 108            | 23.1 | 311            | 203           | 39.6 | 704            | 595            |
| 6  |  | Gambia                            | 5.6  | 24             | 19.8 | 109            | 85            | 37.6 | 282            | 258            |
| 7  |  | Guinea-Bissau                     | 10.2 | 41             | 18.1 | 90             | 49            | 27.9 | 180            | 139            |
| 8  |  | Honduras                          | 49.0 | 1,104          | 49.0 | 1,319          | 215           | 49.0 | 1,495          | 391            |
| 9  |  | Iraq                              | 28.5 | 2,270          | 33.5 | 3,367          | 1,097         | 39.6 | 5,157          | 2,887          |
| 10 |  | Kyrgyzstan                        | 26.3 | 401            | 32.1 | 501            | 100           | 39.4 | 703            | 301            |
| 11 |  | Lesotho                           | 46.4 | 251            | 46.4 | 290            | 39            | 46.4 | 337            | 86             |
| 12 |  | Mongolia                          | 36.9 | 305            | 39.5 | 331            | 26            | 42.8 | 392            | 87             |
| 13 |  | Nicaragua                         | 59.2 | 960            | 59.2 | 1,053          | 93            | 59.2 | 1,119          | 159            |
| 14 |  | North Korea                       | 58.5 | 3,899          | 58.5 | 3,800          | -100          | 58.5 | 3,654          | -246           |
| 15 |  | Palestine                         | 33.1 | 348            | 37.0 | 490            | 143           | 41.9 | 717            | 369            |
| 16 |  | Papua New Guinea                  | 24.6 | 449            | 32.5 | 717            | 267           | 42.3 | 1,130          | 680            |
| 17 |  | Sao Tome and Principe             | 27.3 | 12             | 36.2 | 19             | 7             | 47.4 | 32             | 20             |
| 18 |  | Sri Lanka                         | 42.1 | 2,251          | 44.6 | 2,374          | 123           | 47.6 | 2,473          | 222            |
| 19 |  | Sudan                             | 6.5  | 552            | 21.1 | 2,240          | 1,688         | 39.3 | 5,425          | 4,873          |
| 20 |  | Tajikistan                        | 20.3 | 428            | 28.0 | 670            | 242           | 37.5 | 1,086          | 657            |
| 21 |  | Timor-Leste                       | 18.2 | 46             | 24.0 | 74             | 28            | 31.1 | 127            | 81             |
| 22 |  | Uzbekistan                        | 39.9 | 3,334          | 40.1 | 3,597          | 263           | 40.3 | 3,964          | 630            |
| 23 |  | Yemen                             | 21.8 | 1,326          | 30.3 | 2,339          | 1,013         | 41.0 | 4,079          | 2,753          |
| 24 |  | <b>Subtotal</b>                   |      | <b>30,395</b>  |      | <b>38,397</b>  | <b>8,019</b>  |      | <b>51,744</b>  | <b>21,372</b>  |
| 25 |  |                                   |      |                |      |                |               |      |                |                |
| 26 |  |                                   |      |                |      |                |               |      |                |                |
| 27 |  |                                   |      |                |      |                |               |      |                |                |
| 28 |  |                                   |      |                |      |                |               |      |                |                |
| 29 |  |                                   |      |                |      |                |               |      |                |                |
| 30 |  |                                   |      |                |      |                |               |      |                |                |
| 31 |  |                                   |      |                |      |                |               |      |                |                |
| 32 |  |                                   |      |                |      |                |               |      |                |                |
| 33 |  | <b>Total (67 focus countries)</b> |      | <b>268,745</b> |      | <b>350,995</b> | <b>81,855</b> |      | <b>474,920</b> | <b>205,744</b> |

Notes: the predicted mCPR for Chad 2012 was rounded to 0; the columns may add up exactly because our statistical models used exact numbers while results are presented in thousands.

Table 4: Modern contraceptive prevalence rate (mCPR) and % demand satisfied (%SD) in 2012, 2020 and 2030 in 36 commitment-making countries: assuming the achievement of FP2020 and extending its mCPR trajectories to 2030

| Country                       | 2020 |             | 2030 |             |
|-------------------------------|------|-------------|------|-------------|
|                               | mCPR | %SD         | mCPR | %SD         |
| <b>Sub-Saharan Africa(26)</b> |      |             |      |             |
| Benin                         | 19.1 | 33.7        | 33.1 | 52.0        |
| Burkina Faso                  | 27.4 | 47.1        | 41.4 | 63.5        |
| Burundi                       | 28.9 | 46.5        | 42.9 | 62.5        |
| Cameroon                      | 27.8 | 48.3        | 41.8 | 64.5        |
| Chad                          | 15.9 | 31.4        | 29.9 | 50.5        |
| Côte d'Ivoire                 | 23.7 | 42.6        | 37.7 | 59.8        |
| DR Congo                      | 18.8 | 33.5        | 32.8 | 51.9        |
| Ethiopia                      | 40.9 | 63.6        | 54.9 | <b>76.7</b> |
| Ghana                         | 32.8 | 50.5        | 46.8 | 65.6        |
| Guinea                        | 15.8 | 31.8        | 29.8 | 50.9        |
| Liberia                       | 28.9 | 49.0        | 42.9 | 65.0        |
| Madagascar                    | 40.4 | 61.4        | 54.4 | <b>74.7</b> |
| Malawi                        | 62.1 | <b>77.7</b> | 76.1 | <b>85.8</b> |
| Mali                          | 21.1 | 42.6        | 35.1 | 60.5        |
| Mauritania                    | 22.7 | 40.8        | 36.7 | 58.3        |
| Mozambique                    | 22.5 | 45.6        | 36.5 | 63.1        |
| Niger                         | 23.4 | 49.9        | 37.4 | 67.2        |
| Nigeria                       | 22.0 | 44.7        | 36.0 | 62.3        |
| Rwanda                        | 56.8 | 73.3        | 70.8 | <b>82.6</b> |
| Senegal                       | 27.3 | 48.6        | 41.3 | 65.0        |
| Sierra Leone                  | 24.9 | 47.9        | 38.9 | 64.9        |
| South Sudan                   | 12.9 | 23.8        | 26.9 | 43.6        |
| Togo                          | 26.9 | 42.8        | 40.9 | 59.3        |
| Uganda                        | 37.0 | 54.6        | 51.0 | 68.7        |
| Tanzania                      | 40.5 | 63.8        | 54.5 | <b>77.0</b> |
| Zambia                        | 53.1 | 72.0        | 67.1 | <b>82.2</b> |
| <b>Other regions (10)</b>     |      |             |      |             |
| Afghanistan                   | 31.0 | 56.9        | 45.0 | 72.4        |
| Bangladesh                    | 70.5 | <b>83.1</b> | 84.5 | <b>89.2</b> |
| Haiti                         | 42.5 | 59.7        | 56.5 | 72.5        |
| India                         | 59.1 | <b>78.0</b> | 73.1 | <b>86.8</b> |
| Laos                          | 53.9 | 70.1        | 67.9 | <b>80.2</b> |

|  |                 |      |             |      |             |
|--|-----------------|------|-------------|------|-------------|
|  | Nepal           | 54.4 | 72.1        | 68.4 | <b>82.0</b> |
|  | Pakistan        | 37.3 | 57.7        | 51.3 | 71.6        |
|  | Philippines     | 48.3 | 62.7        | 62.3 | 74.0        |
|  | Solomon Islands | 38.6 | 73.3        | 52.6 | <b>87.0</b> |
|  | Viet Nam        | 69.7 | <b>77.3</b> | 83.7 | <b>83.6</b> |

Notes: bold indicates reaching the target of satisfying 75% demand for family planning;  
Madagascar's 74.7% in 2030 can be rounded to 75%.

For peer review only

1  
2  
3  
4  
5  
6  
7  
8  
9  
10  
11  
12  
13  
14  
15  
16  
17  
18  
19  
20  
21  
22  
23  
24  
25  
26  
27  
28  
29  
30  
31  
32  
33  
34  
35  
36  
37  
38  
39  
40  
41  
42  
43  
44  
45  
46  
47  
48  
49  
50  
51  
52  
53  
54  
55  
56  
57  
58  
59  
60

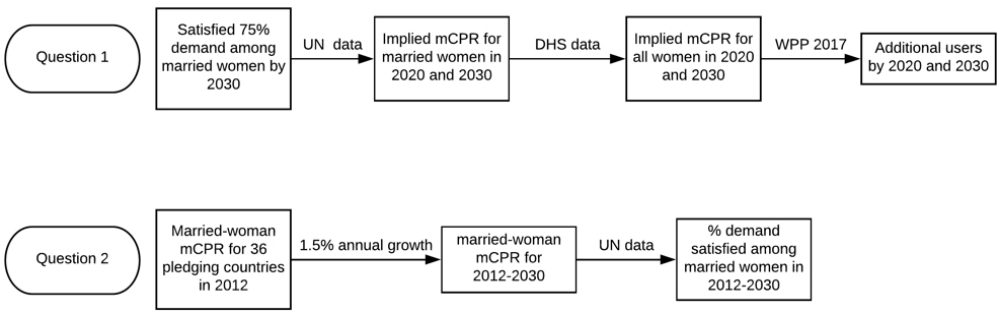

Figure 1: Analytical flowchart for the two research questions

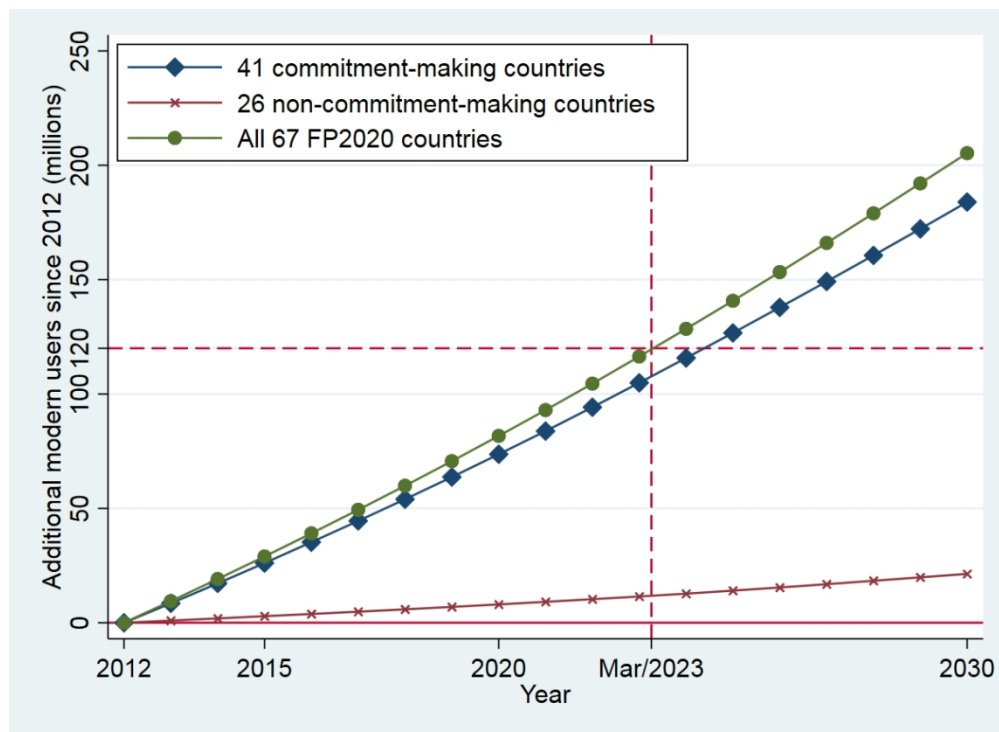

Figure 2: Number of additional modern contraceptive users in 41 pledging and 26 non-pledging countries assuming the trajectory of satisfying 75% demand by 2030

423x308mm (72 x 72 DPI)

## STROBE Statement—checklist of items that should be included in reports of observational studies

|                              | Item No. | Recommendation                                                                                                                                                                                                                                                                                                                                                                                                                                                                                                                                                                                                                                                                                   | Page No. |
|------------------------------|----------|--------------------------------------------------------------------------------------------------------------------------------------------------------------------------------------------------------------------------------------------------------------------------------------------------------------------------------------------------------------------------------------------------------------------------------------------------------------------------------------------------------------------------------------------------------------------------------------------------------------------------------------------------------------------------------------------------|----------|
| <b>Title and abstract</b>    | 1        | (a) Indicate the study's design with a commonly used term in the title or the abstract                                                                                                                                                                                                                                                                                                                                                                                                                                                                                                                                                                                                           | 1        |
|                              |          | (b) Provide in the abstract an informative and balanced summary of what was done and what was found                                                                                                                                                                                                                                                                                                                                                                                                                                                                                                                                                                                              | 2-3      |
| <b>Introduction</b>          |          |                                                                                                                                                                                                                                                                                                                                                                                                                                                                                                                                                                                                                                                                                                  |          |
| Background/rationale         | 2        | Explain the scientific background and rationale for the investigation being reported                                                                                                                                                                                                                                                                                                                                                                                                                                                                                                                                                                                                             | 4-6      |
| Objectives                   | 3        | State specific objectives, including any prespecified hypotheses                                                                                                                                                                                                                                                                                                                                                                                                                                                                                                                                                                                                                                 | 6        |
| <b>Methods</b>               |          |                                                                                                                                                                                                                                                                                                                                                                                                                                                                                                                                                                                                                                                                                                  |          |
| Study design                 | 4        | Present key elements of study design early in the paper                                                                                                                                                                                                                                                                                                                                                                                                                                                                                                                                                                                                                                          | 6        |
| Setting                      | 5        | Describe the setting, locations, and relevant dates, including periods of recruitment, exposure, follow-up, and data collection                                                                                                                                                                                                                                                                                                                                                                                                                                                                                                                                                                  | 6-7      |
| Participants                 | 6        | (a) <i>Cohort study</i> —Give the eligibility criteria, and the sources and methods of selection of participants. Describe methods of follow-up<br><i>Case-control study</i> —Give the eligibility criteria, and the sources and methods of case ascertainment and control selection. Give the rationale for the choice of cases and controls<br><i>Cross-sectional study</i> —Give the eligibility criteria, and the sources and methods of selection of participants<br>(b) <i>Cohort study</i> —For matched studies, give matching criteria and number of exposed and unexposed<br><i>Case-control study</i> —For matched studies, give matching criteria and the number of controls per case |          |
| Variables                    | 7        | Clearly define all outcomes, exposures, predictors, potential confounders, and effect modifiers. Give diagnostic criteria, if applicable                                                                                                                                                                                                                                                                                                                                                                                                                                                                                                                                                         | 6-8      |
| Data sources/<br>measurement | 8*       | For each variable of interest, give sources of data and details of methods of assessment (measurement). Describe comparability of assessment methods if there is more than one group                                                                                                                                                                                                                                                                                                                                                                                                                                                                                                             | 6-11     |
| Bias                         | 9        | Describe any efforts to address potential sources of bias                                                                                                                                                                                                                                                                                                                                                                                                                                                                                                                                                                                                                                        | 6-11     |
| Study size                   | 10       | Explain how the study size was arrived at                                                                                                                                                                                                                                                                                                                                                                                                                                                                                                                                                                                                                                                        | 6        |

Continued on next page



|                        |     |                                                                                                                                                                                                                                                                                                           |       |
|------------------------|-----|-----------------------------------------------------------------------------------------------------------------------------------------------------------------------------------------------------------------------------------------------------------------------------------------------------------|-------|
| Quantitative variables | 11  | Explain how quantitative variables were handled in the analyses. If applicable, describe which groupings were chosen and why                                                                                                                                                                              | 6-8   |
| Statistical methods    | 12  | (a) Describe all statistical methods, including those used to control for confounding                                                                                                                                                                                                                     | 6-11  |
|                        |     | (b) Describe any methods used to examine subgroups and interactions                                                                                                                                                                                                                                       |       |
|                        |     | (c) Explain how missing data were addressed                                                                                                                                                                                                                                                               |       |
|                        |     | (d) <i>Cohort study</i> —If applicable, explain how loss to follow-up was addressed<br><i>Case-control study</i> —If applicable, explain how matching of cases and controls was addressed<br><i>Cross-sectional study</i> —If applicable, describe analytical methods taking account of sampling strategy |       |
|                        |     | (e) Describe any sensitivity analyses                                                                                                                                                                                                                                                                     |       |
| <b>Results</b>         |     |                                                                                                                                                                                                                                                                                                           |       |
| Participants           | 13* | (a) Report numbers of individuals at each stage of study—eg numbers potentially eligible, examined for eligibility, confirmed eligible, included in the study, completing follow-up, and analysed                                                                                                         |       |
|                        |     | (b) Give reasons for non-participation at each stage                                                                                                                                                                                                                                                      |       |
|                        |     | (c) Consider use of a flow diagram                                                                                                                                                                                                                                                                        |       |
| Descriptive data       | 14* | (a) Give characteristics of study participants (eg demographic, clinical, social) and information on exposures and potential confounders                                                                                                                                                                  |       |
|                        |     | (b) Indicate number of participants with missing data for each variable of interest                                                                                                                                                                                                                       |       |
|                        |     | (c) <i>Cohort study</i> —Summarise follow-up time (eg, average and total amount)                                                                                                                                                                                                                          |       |
| Outcome data           | 15* | <i>Cohort study</i> —Report numbers of outcome events or summary measures over time                                                                                                                                                                                                                       |       |
|                        |     | <i>Case-control study</i> —Report numbers in each exposure category, or summary measures of exposure                                                                                                                                                                                                      |       |
|                        |     | <i>Cross-sectional study</i> —Report numbers of outcome events or summary measures                                                                                                                                                                                                                        |       |
| Main results           | 16  | (a) Give unadjusted estimates and, if applicable, confounder-adjusted estimates and their precision (eg, 95% confidence interval). Make clear which confounders were adjusted for and why they were included                                                                                              | 11-13 |
|                        |     | (b) Report category boundaries when continuous variables were categorized                                                                                                                                                                                                                                 |       |
|                        |     | (c) If relevant, consider translating estimates of relative risk into absolute risk for a meaningful time period                                                                                                                                                                                          |       |

Continued on next page

|                          |    |                                                                                                                                                                            |       |
|--------------------------|----|----------------------------------------------------------------------------------------------------------------------------------------------------------------------------|-------|
| Other analyses           | 17 | Report other analyses done—eg analyses of subgroups and interactions, and sensitivity analyses                                                                             |       |
| <b>Discussion</b>        |    |                                                                                                                                                                            |       |
| Key results              | 18 | Summarise key results with reference to study objectives                                                                                                                   | 11-13 |
| Limitations              | 19 | Discuss limitations of the study, taking into account sources of potential bias or imprecision. Discuss both direction and magnitude of any potential bias                 | 16-17 |
| Interpretation           | 20 | Give a cautious overall interpretation of results considering objectives, limitations, multiplicity of analyses, results from similar studies, and other relevant evidence | 17    |
| Generalisability         | 21 | Discuss the generalisability (external validity) of the study results                                                                                                      | 17    |
| <b>Other information</b> |    |                                                                                                                                                                            |       |
| Funding                  | 22 | Give the source of funding and the role of the funders for the present study and, if applicable, for the original study on which the present article is based              | 18    |

\*Give information separately for cases and controls in case-control studies and, if applicable, for exposed and unexposed groups in cohort and cross-sectional studies.

**Note:** An Explanation and Elaboration article discusses each checklist item and gives methodological background and published examples of transparent reporting. The STROBE checklist is best used in conjunction with this article (freely available on the Web sites of PLoS Medicine at <http://www.plosmedicine.org/>, Annals of Internal Medicine at <http://www.annals.org/>, and Epidemiology at <http://www.epidem.com/>). Information on the STROBE Initiative is available at [www.strobe-statement.org](http://www.strobe-statement.org).

# BMJ Open

## Capitalizing on shared goals for family planning: a concordance assessment of two global initiatives using longitudinal statistical models

|                                 |                                                                                                                                                                                                                                                                                                                     |
|---------------------------------|---------------------------------------------------------------------------------------------------------------------------------------------------------------------------------------------------------------------------------------------------------------------------------------------------------------------|
| Journal:                        | <i>BMJ Open</i>                                                                                                                                                                                                                                                                                                     |
| Manuscript ID                   | bmjopen-2019-031425.R2                                                                                                                                                                                                                                                                                              |
| Article Type:                   | Original research                                                                                                                                                                                                                                                                                                   |
| Date Submitted by the Author:   | 08-Oct-2019                                                                                                                                                                                                                                                                                                         |
| Complete List of Authors:       | Li, Qingfeng; Johns Hopkins Bloomberg School of Public Health, International Health<br>Rimon, Jose; Johns Hopkins Bloomberg School of Public Health, Population, Family and Reproductive Health<br>Ahmed, Saifuddin; Johns Hopkins University, Population, family and reproductive Health; Johns Hopkins University |
| <b>Primary Subject Heading</b>: | Global health                                                                                                                                                                                                                                                                                                       |
| Secondary Subject Heading:      | Public health                                                                                                                                                                                                                                                                                                       |
| Keywords:                       | Family planning, Global initiatives, FP2020, 75% satisfied demand                                                                                                                                                                                                                                                   |
|                                 |                                                                                                                                                                                                                                                                                                                     |

SCHOLARONE™  
Manuscripts

1  
2  
3 **Capitalizing on shared goals for family planning: a concordance assessment of two global**  
4 **initiatives using longitudinal statistical models**  
5

6 Qingfeng Li<sup>1,2</sup>, Jose G. Rimon<sup>2</sup>, Saifuddin Ahmed<sup>2</sup>  
7

8 <sup>1</sup>Department of International Health  
9

10 <sup>2</sup>Bill & Melinda Gates Institute for Population and Reproductive Health  
11

12 Department of Population, Family and Reproductive Health  
13

14 Johns Hopkins Bloomberg School of Public Health, Baltimore, Maryland, United States of  
15 America  
16  
17

18 **Corresponding author:**

19 Qingfeng Li, MHS, PhD

20 Bloomberg School of Public Health

21 Johns Hopkins University

22 615 North Wolfe Street E8642

23 Baltimore, MD 21205

24 Tel:(410) 614-4890

25 e-mail: [qli28@jhu.edu](mailto:qli28@jhu.edu)  
26  
27  
28  
29  
30

31 **Keywords:** Family planning, Global initiatives, FP2020, 75% satisfied demand  
32  
33  
34

35 **Word Count:** Abstract: 291; Body: 3555  
36  
37  
38  
39  
40  
41  
42  
43  
44  
45  
46  
47  
48  
49  
50  
51  
52  
53  
54  
55  
56  
57  
58  
59  
60

1  
2  
3 **Objective:** Family planning is unique among health interventions in its breadth of health,  
4 development and economic benefits. The complexity of formulating effective strategies to  
5 promote women's and girls' access to family planning calls for closer coordination of resources  
6 and attention from all stakeholders. Our objective was to quantify the concordance of two global  
7 initiatives: Family Planning 2020's adding 120 million modern contraceptive users by 2020  
8 (proposed during The London Summit 2012 by Gates Foundation) and satisfying the 75%  
9 demand for modern contraceptives by 2030 (proposed by United States Agency for International  
10 Development). A demonstration of their concordance, or lack thereof, provides an understanding  
11 of the proposed quantitative goals and helps to formulate collective strategies.  
12  
13  
14  
15  
16  
17  
18  
19  
20  
21  
22  
23  
24  
25

26 **Design and setting:** We applied fixed effects longitudinal models to assess the convergence of  
27 the two initiatives. The implications of success in one initiative on achieving the other are  
28 simulated to illustrate their shared goals. Publicly available data on contraceptive use, unmet  
29 need, and met need from national surveys are used. Extensive model validations were conducted  
30 to check and confirm models' predictive performance.  
31  
32  
33  
34  
35  
36  
37  
38  
39

40 **Results:** Our results show that the 75% satisfied demand initiative will reach 82 million  
41 additional modern users by 2020 and 120 million by early 2023. Following FP2020's proposed  
42 annual increase of modern contraceptive use, nine of the 41 commitment-making countries will  
43 reach the 75% target by 2020; another eight countries will do so by 2030. Extending FP2020's  
44 proposed contraceptive growth to 2030 implies the achievement of the 75% target in less than  
45 half (17) of the 41 commitment-making countries.  
46  
47  
48  
49  
50  
51  
52  
53  
54  
55  
56  
57  
58  
59  
60

1  
2  
3 **Conclusions:** The results from the statistical exercise demonstrate that the two global initiatives  
4 move toward the same goal of promoting access to FP and overall both are ambitious. Closer  
5 coordination between major stakeholders in international family planning may stimulate more  
6 efficient mobilization and utilization of global sources, which is urgently needed to accelerate the  
7 progress toward satisfying women's need for family planning.  
8  
9  
10  
11  
12  
13  
14  
15  
16

### 17 **Strengths of this study**

- 18 - This study is the first systematic comparison of two major global initiatives on family planning
- 19 - The estimations are based on rigorously developed and validated statistical models
- 20 - The findings provide new insights into the shared goals of the two initiatives and have important  
21 policy implications

### 22 **Limitations of this study**

- 23 - Relying on secondary data restricts variable selection for the statistical models.
- 24 - The linear growth curve assumed for modern contraceptive prevalence rate (mCPR) in the study  
25 may not be accurate for each country.

## Introduction

Access to family planning is a critical component of reproductive rights and leads to multi-faceted benefits for women and their families. It is unique among health interventions in its breadth of health, development and economic benefits, such as reducing maternal and child mortality, empowering women and girls, and enhancing environmental sustainability.<sup>1,2</sup> The Lancet series on family planning in 2012 documented strong evidence of the extensive gains resulting from family planning. Ahmed and colleagues estimated that contraceptive use in 172 countries averted 272,040 maternal deaths in 2008, and satisfying unmet need for contraceptive methods could prevent another 104,000 deaths per year.<sup>2</sup> Cleland and colleagues made nearly identical estimates using a different methodology.<sup>3</sup> Additionally, Canning and Schultz evaluated the economic consequences of family planning, including increases in female labor force participation and proportion in paid employment.<sup>4</sup>

However, after reaching their global peak following the 1994 International Conference on Population and Development (ICPD) in Cairo, both financial support and political commitments for family planning have plateaued, and even declined in many countries, in the decade prior to 2012.<sup>1,5</sup> Consequently, progress towards providing access to contraception for women and girls in developing countries has been slow. On average, women in Sub-Saharan Africa continue to have more than five children.<sup>6</sup>

Compared with other public health interventions, family planning has two unique features that need special attention. First, due to cultural, religious, and political reasons, family planning is more controversial than many other public health issues.<sup>1</sup> Even the proponents of family

1  
2  
3 planning disagree with each other over what the primary aims should be. Some emphasize  
4  
5 ecological concerns, specifically the effect of fertility declines on population structure,  
6  
7 ecosystem, and economy. Others emphasize human rights concerns, promoting women's control  
8  
9 over their own reproduction.<sup>7</sup>  
10  
11  
12

13  
14  
15 Second, unlike other public health issues, such as reducing child mortality, the biomedical side  
16  
17 of family planning is well-established, with proven methods to space and limit pregnancies.  
18

19  
20 Where the successful implementation of family planning programs is concerned, it has been  
21  
22 established that a key element is a political issue of obtaining support from and forming a broad  
23  
24 coalition of elite groups.<sup>1,7</sup> This has proven successful in many countries, but remains elusive in  
25  
26 some, especially in Sub-Saharan Africa.  
27  
28

29  
30  
31 The complexity of formulating effective strategies to promote women's and girls' access to  
32  
33 family planning calls for closer coordination of resources and attention from all stakeholders. As  
34  
35 noted by Kim and Ammann (2004), a clear consensus on targets and priorities is indispensable  
36  
37 for all successful public projects in the modern era.<sup>8</sup>  
38  
39  
40  
41

42  
43 During the past few years, two major family planning initiatives were launched. First, the  
44  
45 London Summit on Family Planning in July 2012, was convened by the United Kingdom's  
46  
47 Department for International Development (DFID) and the Bill & Melinda Gates Foundation  
48  
49 (BMGF). At the Summit, leaders proposed adding 120 million female modern contraceptive  
50  
51 users in the world's 69 poorest countries by 2020.<sup>9</sup> The second initiative, led by the United States  
52  
53 Agency for International Development (USAID), proposed a target of satisfying 75% of the  
54  
55  
56  
57  
58  
59  
60



1  
2  
3 demand for family planning with modern contraceptives by 2030.<sup>10,11</sup> This indicator of satisfied  
4 demand was subsequently adopted in the Sustainable Development Goals.<sup>12</sup> The percent satisfied  
5 demand is the proportion of women who use modern contraception divided by the total demand  
6 for family planning, which is defined by adding the percentage of married or in-union women  
7 aged 15-49 who are using any contraception to the percentage of women with unmet need.  
8 Unmet need refers to the proportion of women who want to stop or delay childbearing but are  
9 not using any method of contraception. Following Fabic et al., in the present study, we only  
10 consider the demand for FP among married or in-union women aged 15-49 years.<sup>10</sup>  
11  
12  
13  
14  
15  
16  
17  
18  
19  
20  
21  
22  
23

24 FP2020 and 75% satisfied demand are two ambitious family planning initiatives. A recent  
25 assessment of FP2020 found that progress has been made with diverse country-level growth  
26 rates, but overall the initiative is below the proposed trajectory.<sup>13</sup> Given the scale of the  
27 initiatives and the number of partners involved in the family planning field, improved  
28 coordination, and a broader coalition is necessary to achieve the goals. The objective of this  
29 study is to assess the concordance of these two initiatives by estimating the implication of  
30 accomplishing one target on the other. A demonstration of their consistency, or the lack thereof,  
31 provides a better understanding of the proposed quantitative goals and helps to formulate  
32 collective strategies.  
33  
34  
35  
36  
37  
38  
39  
40  
41  
42  
43  
44  
45  
46

## 47 **Methods**

48  
49 The contraceptive prevalence data are from the United Nations Development Programme  
50 (UNDP) survey-based estimates of the percentage of married or in-union women aged 15-49  
51 using any modern contraceptive method.<sup>14</sup> The database includes estimates of modern  
52  
53  
54  
55  
56  
57  
58  
59  
60

1  
2  
3 contraceptive prevalence rate (mCPR) and % satisfied demand collected from 466 surveys in 142  
4  
5 countries from 1986 to 2016. Among the 70 FP2020 focus countries (South Africa joined the  
6  
7 FP2020 Initiative after the London Summit), three countries (Djibouti, Somalia, and Western  
8  
9 Sahara) do not have any survey-based estimates of mCPR and % satisfied demand and therefore  
10  
11 are excluded from the present study. In the end, our study is based on 67 FP2020 countries, with  
12  
13 a focus on the 41 countries that made a commitment to the FP2020 Initiative (defined as  
14  
15 commitment-making countries; see [www.familyplanning2020.org](http://www.familyplanning2020.org) for a full and up-to-date list;  
16  
17 accessed on February 20, 2019).  
18  
19  
20  
21  
22  
23

24 The target measures discussed in this study are closely correlated by definition. Let P denote the  
25  
26 total number of women aged 15-49 years, N denote the number of women who express a need  
27  
28 for family planning, C denote the number of female modern contraceptive users, T denote the  
29  
30 number of modern and traditional contraceptive users, U denote the number with unmet need for  
31  
32 family planning. Then we have  $mCPR = C/P$ ,  $\% \text{ unmet need} = U/P$ , and  $\% \text{ met need (or satisfied}$   
33  
34  $\text{demand}) = C/N$ .  
35  
36  
37

$$38 \quad \% \text{ satisfied demand} = \frac{C}{N} = \frac{C}{T + U} = \frac{mCPR}{CPR + \% \text{unmet need}}$$

39  
40  
41 An increase in C implies higher mCPR, but it does not necessarily increase % satisfied demand.  
42  
43 The relationship between the indicators becomes complex in other scenarios, such as when more  
44  
45 women express a need for family planning. This will decrease the % met need without affecting  
46  
47 mCPR. The congruence, and lack of it, has been observed in FP2020 countries. From 2012 to  
48  
49 2017, the high growth of mCPR has driven a nine-percentage point increase in demand satisfied  
50  
51 in Eastern and Southern Africa. During the same period, Central and West Africa experienced  
52  
53 comparable mCPR growth, but that was accompanied by increasing levels of unmet need. These  
54  
55  
56  
57  
58  
59  
60

1  
2  
3 are the results of a complex dynamic involving both fertility intentions and available family  
4  
5 planning services. As a result, our subsequent empirical analyses will be based on probabilistic  
6  
7 statistical regression rather than deterministic mathematical relationships.  
8  
9

10  
11  
12 Another complicating factor is that FP2020 counts all women, irrespective of their marital status,  
13  
14 while the 75% target only covers married or in-union women. Although subsequent debates  
15  
16 consider expanding the satisfied demand target to all women, no consensus has been reached,  
17  
18 and therefore we will use the original statement of the 75% target. The difference in  
19  
20 denominators will be dealt with in our statistical models.  
21  
22  
23

24  
25  
26 The congruence between FP2020 and 75% satisfied demand targets requires a bi-directional  
27  
28 assessment. We estimated the implications of achieving one of them on the other. Specifically,  
29  
30 the study attempts to answer the following two questions: (1) how many additional users will be  
31  
32 added following the 75% satisfied demand target; (2): what percentage of demand will be  
33  
34 satisfied in 41 commitment-making countries assuming an annual increase of 1.4 percentage  
35  
36 points from 2012 until 2030? Annual growth of 1.4% is the overall target proposed by the  
37  
38 London Summit on Family Planning Metrics Group across all FP2020 focus countries<sup>9</sup>. Overall  
39  
40 annual growth of 0.7 percentage points was observed across the world's 69 poorest countries  
41  
42 before 2012. Brown et al. estimated that doubling the annual growth to 1.4 would add 120  
43  
44 million female modern contraceptive users by 2020. The target growth rate is considered an  
45  
46 aspirational yet achievable goal assuming the resources and leadership around current family  
47  
48 planning programs may be collectively mobilized. These two assessments are conducted  
49  
50 separately, albeit employing a similar methodology (Figure 1).  
51  
52  
53  
54  
55  
56  
57

<Figure 1 about here>

There are three steps to answer the first research question. The first step is to estimate the necessary married-woman mCPR to satisfy 75% demand with modern methods by 2030. Among the 41 commitment-making countries, five FP2020 commitment-making countries had already reached the 75% satisfied demand goal in their most recent surveys (Table 1). It is reasonable to assume that maintaining at least 75% satisfied demand by 2030 is the goal in those countries. We assume the mCPR and % satisfied demand will remain at their most recent observed level until 2030.

<Table 1 about here>

For the other 36 countries, the percentage of demand satisfied with modern methods is assumed to reach 75% in 2030. Then we employ the following country-level fixed effects longitudinal model to estimate the required mCPR for the assumed 75% satisfied demand.

$$y_{it} = \beta_0 + \beta_1 x_{it} + \beta_2 x_{it}^2 + \alpha_i + \varepsilon_{it} \quad (1)$$

where  $y_{it}$  denote the mCPR for country  $i$  in time  $t$ ;  $x_{it}$  denotes the % satisfied demand for country  $i$  in time  $t$ ;  $\alpha_i$  denotes the time-invariant unobserved fixed effects for country  $i$ ;  $\varepsilon_{it}$  denotes the error term. The mode is chosen from several options due to its best predictive performance. The model is first fitted using survey-based data compiled by the United Nations. The Least Squares Dummy Variable (LSDV) method is used in the model estimation<sup>15</sup>. This

1  
2  
3 approach explicitly provides the coefficients of the country dummy, which is required in  
4  
5 predicting the mCPR for the assumed 75% satisfied demand in 2030. Then with the estimated  
6  
7 coefficients and country-level fixed effects, we estimate mCPR for the assumed 75% satisfied  
8  
9 demand.  
10

11  
12  
13  
14 The second step is to convert the married-woman mCPR estimated in step 1 to all-woman  
15  
16 mCPR. Two hundred sixty-two DHS surveys based on samples of all women of reproductive  
17  
18 ages were conducted from 1990 to 2016 in 85 countries. We use the following fixed effects  
19  
20 longitudinal model to estimate all-woman mCPR from married mCPR  
21  
22  
23  
24  
25

$$26 \quad a_i = \theta_0 + \theta_1 m_i + v_i + \epsilon_{it} \quad (2)$$

27  
28  
29  
30

31 where  $a_i$  and  $m_i$  denote the all-woman and married mCPR in survey  $i$ ;  $v_i$  denotes region (SSA  
32  
33 vs. non-SSA) level fixed effects. We use region level instead of country-level fixed effects  
34  
35 because a model with country-level fixed effects cannot be used for prediction in FP2020  
36  
37 countries without a DHS survey.  
38  
39  
40  
41

42 In the third step, we assume all-woman mCPR will increase linearly from the level in the last  
43  
44 survey to the level estimated for 2030 in step 2. Using the number of women of reproductive age  
45  
46 obtained from World Population Prospects 2017, we calculate the number of female modern  
47  
48 contraceptive users in the 67 FP2020 focus countries.<sup>16</sup>  
49  
50  
51  
52  
53  
54  
55  
56  
57

1  
2  
3 The second research question is answered similarly in three steps (Figure 1). We first estimate  
4 the baseline, i.e., all-woman mCPR in 2012. Our principle is to rely on the survey-based  
5 estimates as much as possible. As mentioned above, 5 of the 41 FP2020 commitment-making  
6 countries had already reached the 75% satisfied demand goal in their most recent surveys, and  
7 therefore are excluded from this investigation. Among the other 36 commitment-making  
8 countries, 10 conducted a survey in 2012. For those 19 countries that have conducted surveys  
9 both before and after 2012, we use the two surveys before and after 2012 to linearly interpolate  
10 the mCPR for 2012. For the other 7 countries that only have surveys conducted before 2012, we  
11 used the last survey-based estimate for 2012.  
12  
13  
14  
15  
16  
17  
18  
19  
20  
21  
22  
23  
24  
25

26 Then we impose a 1.4% annual increase in all-woman mCPR from 2012 until 2030. Finally, we  
27 predict the % satisfied demand associated with the calculated levels of all-woman mCPR for  
28 2012-2030 based on a fixed effects longitudinal model similar to Equation (1), but moving %  
29 satisfied demand to the left-hand side and including mCPR and its squared term in the right-hand  
30 side.  
31  
32  
33  
34  
35  
36  
37  
38  
39

#### 40 **Patient and Public Involvement**

41 The study does not involve patients or the public.  
42  
43  
44  
45  
46

#### 47 **Results**

48 All three fixed effects longitudinal models fit the data quite well, indicating excellent predictive  
49 performance (Table 2). Using 466 survey-based estimates, the adjusted R-squared of the model  
50 regressing married-woman mCPR on % satisfied demand and a country dummy is above 0.98,  
51  
52  
53  
54  
55  
56  
57  
58  
59  
60

1  
2  
3 meaning that less than 2% of the variations in married-woman mCPR cannot be explained by the  
4 model (Model 1). As a result, the estimated married-woman mCPR based on the assumed 75%  
5 satisfied demand should be highly accurate and reliable. The adjusted R-squared of 0.97 in  
6 Model 2 also indicates accurate conversion from married- to all-woman mCPR. Model 3 that  
7 regresses % satisfied demand on married-woman mCPR also performed well (adjusted R-  
8 squared 0.97).  
9  
10  
11  
12  
13  
14  
15  
16  
17  
18

19 <Table 2 about here>  
20  
21

22  
23 Achieving the 75% satisfied demand by 2030 goal means a gain of approximately 82 million  
24 additional users in these 67 FP2020 countries from 2012 to 2020, which is about 68% of the 120  
25 million proposed by the FP2020 Initiative (Table 3). From 2012 to 2020, these 41 commitment-  
26 making countries will contribute 74 million additional users while these 26 non-commitment-  
27 making FP2020 countries contribute 8 million. If the 67 countries continue the mCPR growth  
28 rate implied by the 75% satisfied demand initiative, the goal of adding 120 million female  
29 modern contraceptive users will be achieved in early 2023 (Figure 2). By 2030, there will be 184  
30 and 21 million additional users in commitment-making and non-commitment-making countries,  
31 respectively, making a total number of 206 additional modern contraceptive users in these 67  
32 FP2020 countries.  
33  
34  
35  
36  
37  
38  
39  
40  
41  
42  
43  
44

45 <Table 3 about here>  
46  
47  
48

49 Five of the 41 FP2020 commitment-making countries (three in sub-Saharan Africa) have already  
50 satisfied 75% or more of the contraceptive demand, according to their last survey. Among the  
51 other 36 commitment-making countries, only four additional countries (Bangladesh, India,  
52  
53  
54  
55  
56  
57

1  
2  
3 Malawi, and Vietnam) will reach that target by 2020, following FP2020's proposed 1.4% annual  
4 increase in mCPR (Table 4). Another eight countries (Ethiopia, Laos, Madagascar, Nepal,  
5  
6 Rwanda, Solomon Islands, Tanzania, and Zambia) will do so by 2030. Disaggregated by region,  
7  
8 the situation is more challenging in sub-Saharan Africa, where only one (Malawi) of the 26  
9  
10 commitment-making countries will reach the 75% target by 2020, and another five countries  
11  
12 (Ethiopia, Madagascar, Rwanda, Tanzania, and Zambia) will do so by 2030. Adding those three  
13  
14 countries that had already reached the target in their most recent surveys, less than one third (9)  
15  
16 of the 29 commitment-making countries in this region will satisfy 75% demand for family  
17  
18 planning by 2030. In the other regions, five countries will achieve the target by 2020, and  
19  
20 another three will do so by 2030. Those eight target-achieving countries represent two-thirds of  
21  
22 the 12 non-SSA commitment-making countries.  
23  
24  
25  
26  
27  
28  
29  
30

31 In sum, assuming FP2020's proposed annual growth rate in mCPR, the % satisfied will reach  
32  
33 75% in less than half (17) of the 41 FP2020 commitment-making countries  
34  
35  
36  
37

38 <Table 4 about here>  
39  
40

## 41 **Discussion**

42  
43 The contribution of this study is an improved understanding of the concordance of two global  
44  
45 family planning initiatives: FP2020's adding 120 female modern contraceptive users by 2020 in  
46  
47 69 of the world's poorest countries and USAID's satisfying 75% demand for family planning  
48  
49 with modern contraceptives. Our results show that the two initiatives move towards the same  
50  
51 goal of promoting access to family planning for women and girls. Overall, both the 75% satisfied  
52  
53 demand and the FP2020 goal are ambitious. Achieving the 75% satisfied demand goal by 2030  
54  
55  
56  
57



1  
2  
3 implies that 82 million or 68% of the 120-million target users will be added by 2020 in 67  
4  
5 FP2020 focus countries. The target of 120 million will be achieved by 2023, only three years  
6  
7 later than the FP2020 deadline. On the other hand, achieving a 1.4% annual increase in all-  
8  
9 woman mCPR will enable only 17 of the 41 commitment-making countries to attain the goal of  
10  
11 75% satisfied demand by 2030. The overall assessment should not mask the across-country  
12  
13 variations. In some countries it is more plausible to achieve the FP2020's proposed annual  
14  
15 increase of 1.4 percentage points than satisfying the 75% demand by 2030. Some other countries,  
16  
17 however, have satisfied 75% demand or will do so by 2030 with an annual mCPR increase below  
18  
19 1.4 percentage points.  
20  
21  
22  
23  
24  
25

26 Capitalizing the shared goals, the demonstrated concordance may facilitate building a broad  
27  
28 coalition to promote family planning in the developing world. These two initiatives represent the  
29  
30 objectives of two major donors to family planning.<sup>17</sup> The % satisfied demand has also been  
31  
32 adopted as an indicator of the Sustainable Development Goals. Due to their different features and  
33  
34 advantages, mCPR (and number of users) and % satisfied demand will continue coexisting in the  
35  
36 international agenda for family planning. Despite their theoretical correlation, the empirical  
37  
38 relation between the two indicators depends on other context-specific factors, such as demand  
39  
40 generation and changes in fertility desire. As a result, an assessment of the empirical correlation  
41  
42 between the two indicators has sustaining policy implications. A consensus goal is critical to  
43  
44 building a broad coalition to collectively and effectively mobilize financial and political  
45  
46 resources and capture global attention.  
47  
48  
49  
50  
51  
52  
53  
54  
55  
56  
57  
58  
59  
60

1  
2  
3 The simulated implications of achieving one target on the other have several policy implications,  
4 which are urgently needed as donors and stakeholders are debating about the post-FP2020 plan.  
5

6  
7 First, multiple measures will continue coexisting in international family planning. The FP2020  
8 Core Group of which the Bill and Melinda Gates Foundation, United Kingdom's Department for  
9 International Development (DFID), USAID and United Nations Population Fund (UNFPA) are  
10 active may renew their commitment to adding female modern contraceptive users beyond  
11 FP2020 to the FP2030 deadline. The % satisfied demand has been adopted as an indicator, SDG  
12 3.7.1. The 75% benchmark is being used as a proxy for the minimum definition of "universal  
13 access to reproductive health" in terms of contraceptive use (SDG 3). Methodologically, our  
14 models for assessing the congruence of the two measures could be replicated as the FP2020  
15 movement sets its goals for FP2030.  
16  
17  
18  
19  
20  
21  
22  
23  
24  
25  
26  
27  
28  
29  
30

31 Second, our exercise sheds light on the choice between aspirational and realistic target-setting  
32 approaches. The findings show that 75% satisfied demand can be viewed in three settings: 1)  
33 countries who have already achieved the goal but whose plans involve increasing the percentage  
34 higher than the 75% benchmark (e.g., Indonesia, Myanmar, Kenya, South Africa), Zimbabwe);  
35 2) countries which are projected to likely reach the goal by 2020 and 2030; and 3) countries  
36 which will remain below the goal (24 of 41 commitment-making countries). With only one year  
37 left before its deadline, FP2020 has contributed to the mobilization of global resources for family  
38 planning and has shown progress against the goal but not at the trajectory to reach 120 million  
39 more women and girls by 2020.  
40  
41  
42  
43  
44  
45  
46  
47  
48  
49  
50  
51  
52  
53  
54  
55  
56  
57  
58  
59  
60

1  
2  
3 The third policy implication is for the choice between global and national targets. All countries  
4 in our exercise belong to low-income countries, but they still demonstrate massive diversity in  
5 terms of mCPR, desired and realized fertility, and population age structure. When setting targets  
6 in the future, donors and stakeholders need to strike a balance between simplification (global  
7 target as in FP2020) and customization (country-specific targets as in 75% satisfied demand).  
8  
9  
10  
11  
12  
13

14  
15  
16  
17 The last policy implication is on SDG. Although % satisfied demand has been adopted as an  
18 indicator (SDG 3.7.1), it has not been associated with quantitative goals. The same situation  
19 occurred to Target 5b of Millennium Development Goals (MDGs): “Achieve, by 2015, universal  
20 access to reproductive health”. Several studies argued that clear, measurable goals could be a  
21 focal point for coalescing political support for action.<sup>9</sup> Reflecting on the lag in substantively  
22 integrating family planning into the MDGs, FP2020 proposed a quantifiable target of adding 120  
23 million female modern contraceptive users by 2020. Adopting the target of 75% satisfied  
24 demand in SDG may help mobilize and guide resource allocation and provide a benchmark for  
25 program advocacy. Per our simulation results, the target is achievable in certain countries and  
26 aspirational in others.  
27  
28  
29  
30  
31  
32  
33  
34  
35  
36  
37  
38  
39  
40  
41

42 The study is not without limitations. First, despite the highly satisfactory model fit, our  
43 regressions could be theoretically improved by including other factors such as calendar time. We  
44 did not include year as a covariate because its coefficient reflects not only temporal effects but  
45 also the changing composition of countries in the database. For example, the earliest DHS  
46 surveys were mostly in Africa, while Asia was added later. So, the absence of calendar time in  
47 the model is a limitation with the database rather than our methodology. Since we are mainly  
48  
49  
50  
51  
52  
53  
54  
55  
56  
57  
58  
59  
60

1  
2  
3 interested in the predictive performance of the model, measured by the adjusted R-squared, and  
4 adding year as a covariate changed the adjusted R-squared by less than 1 percentage point, our  
5 final model did not consider calendar time. The second limitation is the linear assumption on  
6 mCPR growth. Other growth curves (such as S-shaped or logistic) may be more accurate in  
7 many countries. The 67 FP2020 countries are in different stages of mCPR growth, some  
8 experiencing a convex trajectory and some a concave trajectory. Fully accounting for country-  
9 specific curves will likely make the statistical models much more complex and less robust. We  
10 believe a linear trajectory provides an acceptable approximation for the mixture of convex and  
11 concave trajectories. Consequently, the global estimates presented in the study may not be  
12 substantially affected by the assumed linearity.  
13  
14  
15  
16  
17  
18  
19  
20  
21  
22  
23  
24  
25  
26  
27

28 As repeatedly emphasized in the London Summit document, setting a quantitative target should  
29 not cause concern among those firmly committed to sexual and reproductive health and rights  
30 because all interventions will have women's rights at the center of their implementation efforts.  
31 Our assessment in this study of the congruence of major, articulated family planning initiatives  
32 aims to unite international communities into collective actions that secure women's and girls'  
33 access to effective contraceptive methods.  
34  
35  
36  
37  
38  
39  
40  
41  
42  
43

44 **Author contributions:** QL, SA, and JR devised the study and wrote the article. QL compiled the  
45 data and led the statistical modeling and analysis.  
46  
47  
48

49 **Disclosure statement:** No potential conflict of interest was reported by the authors.  
50

51 **Ethics and consent:** This study only uses publicly available secondary data and does not involve  
52 any participants. Therefore, ethical approval and participant consent are not required.  
53  
54  
55  
56  
57

**Data sharing statement:** All data in this paper were obtained from published studies. No additional data are available from the authors.

**Funding:** Bill and Melinda Gates Foundation

## References

1. Cleland J, Bernstein S, Ezeh A, Faundes A, Glasier A, Innis J. Family planning: the unfinished agenda. *The Lancet* 2006; **368**(9549): 1810-27.
2. Ahmed S, Li Q, Liu L, Tsui AO. Maternal deaths averted by contraceptive use: an analysis of 172 countries. *The Lancet* 2012; **380**(9837): 111-25.
3. Cleland J, Conde-Agudelo A, Peterson H, Ross J, Tsui A. Contraception and health. *Lancet (London, England)* 2012; **380**(9837): 149-56.
4. Canning D, Schultz TP. The economic consequences of reproductive health and family planning. *Lancet (London, England)* 2012; **380**(9837): 165-71.
5. Cohen SA. London summit puts family planning back on the agenda, offers new lease on life for millions of women and girls. *Guttmacher Policy Review* 2012; **15**(3): 20-4.
6. Ezeh AC, Bongaarts J, Mberu B. Global population trends and policy options. *Lancet (London, England)* 2012; **380**(9837): 142-8.
7. Shiffman J, Quissell K. Family planning: a political issue. *Lancet (London, England)* 2012; **380**(9837): 181-5.
8. Kim JY, Ammann A. Is the "3 by 5" Initiative the Best Approach to Tackling the HIV Pandemic? *PLoS Medicine* 2004; **1**(2): e37.
9. Brown W, Druce N, Bunting J, et al. Developing the "120 by 20" goal for the Global FP2020 Initiative. *Stud Fam Plann* 2014; **45**(1): 73-84.
10. Fabic MS, Choi Y, Bongaarts J, et al. Meeting demand for family planning within a generation: the post-2015 agenda. *Lancet (London, England)* 2015; **385**(9981): 1928-31.
11. Choi Y, Short Fabic M. Monitoring Progress in Equality for the Sustainable Development Goals: A Case Study of Meeting Demand for Family Planning. *Global health, science and practice* 2018; **6**(2): 390-401.
12. United Nations General Assembly. Sustainable Development Goals 3. <https://sustainabledevelopment.un.org/sdg3> (accessed August 9 2019).
13. Cahill N, Sonneveldt E, Stover J, et al. Modern contraceptive use, unmet need, and demand satisfied among women of reproductive age who are married or in a union in the focus countries of the Family Planning 2020 initiative: a systematic analysis using the Family Planning Estimation Tool. *Lancet (London, England)* 2017.
14. United Nations DoEaSA, Population Division (2017). World Contraceptive Use 2017 (POP/DB/CP/Rev2017).
15. Greene WH. Econometric analysis: Prentice Hall; 2011.
16. United Nations DoEaSA, Population Division, W. World Population Prospects: The 2017 Revision, Key Findings and Advance Tables. Working Paper No. ESA/P/WP/248. 2017.
17. IHME. Financing Global Health 2014: Shifts in Funding as the MDG Era Closes. Seattle, WA: IHME; 2015.

1  
2  
3 Figure 1: Analytical flowchart for the two research questions  
4

5 Figure 2: Number of additional female modern contraceptive users in 41 commitment-making  
6 and 26 non-commitment-making countries assuming the trajectory of satisfying 75% demand by  
7 2030  
8  
9

10  
11  
12  
13  
14  
15  
16  
17  
18  
19  
20  
21  
22  
23  
24  
25  
26  
27  
28  
29  
30  
31  
32  
33  
34  
35  
36  
37  
38  
39  
40  
41  
42  
43  
44  
45  
46  
47  
48  
49  
50  
51  
52  
53  
54  
55  
56  
57  
58  
59  
60

For peer review only

Table 1: Modern contraceptive prevalence rate (mCPR) in 5 commitment-making countries where % demand satisfied exceeded 75% in the last survey

| Country      | Region  | Survey date | mCPR | % demand satisfied |
|--------------|---------|-------------|------|--------------------|
| Myanmar      | Non-SSA | 2015-16     | 51.3 | 75.0               |
| Kenya        | SSA     | 2015        | 62.6 | 76.2               |
| Indonesia    | Non-SSA | 2015-16     | 59.5 | 78.8               |
| South Africa | SSA     | 2003-04     | 59.8 | 81.1               |
| Zimbabwe     | SSA     | 2015        | 65.8 | 85.2               |

Notes: SSA denotes sub-Saharan Africa; non-SSA includes all other regions

Table 2: Goodness of fit of the fixed effects longitudinal models

|                      | Model 1                                                 | Model 2                     | Model 3                                     |
|----------------------|---------------------------------------------------------|-----------------------------|---------------------------------------------|
| <b>Outcome</b>       | Married mCPR                                            | All-woman mCPR              | % satisfied demand                          |
| <b>Covariates</b>    | % satisfied demand<br>(% satisfied demand) <sup>2</sup> | Married mCPR                | Married mCPR<br>(married mCPR) <sup>2</sup> |
| <b>Fixed effects</b> | Country level                                           | Region (SSA; non-SSA) level | Country level                               |
| <b>Sample size</b>   | 466                                                     | 262                         | 466                                         |
| <b>R-squared</b>     | 0.98                                                    | 0.91                        | 0.97                                        |

For peer review only



Table 3: Modern contraceptive prevalence rate (mCPR), modern contraceptive users (thousand), and added users since 2012 (thousand) in 41 commitment-making and 26 non-commitment-making countries under FP2020: assuming the achievement of 75% satisfied demand by 2030

| Country                                 | 2012 |         | 2020 |         |             | 2030 |         |             |
|-----------------------------------------|------|---------|------|---------|-------------|------|---------|-------------|
|                                         | mCPR | Users   | mCPR | Users   | Added users | mCPR | Users   | Added users |
| <b>Commitment-making countries (41)</b> |      |         |      |         |             |      |         |             |
| Afghanistan                             | 10.4 | 691     | 22.7 | 2,065   | 1,374       | 38.1 | 4,645   | 3,954       |
| Bangladesh                              | 41.2 | 17,800  | 42.4 | 20,200  | 2,366       | 43.8 | 22,200  | 4,369       |
| Benin                                   | 7.0  | 158     | 22.0 | 636     | 478         | 40.9 | 1,570   | 1,412       |
| Burkina Faso                            | 13.5 | 515     | 25.5 | 1,249   | 734         | 40.5 | 2,704   | 2,189       |
| Burundi                                 | 16.7 | 371     | 27.5 | 768     | 397         | 41.0 | 1,599   | 1,229       |
| Cameroon                                | 14.2 | 708     | 25.8 | 1,621   | 913         | 40.3 | 3,362   | 2,655       |
| Chad                                    | 0    | 0       | 17.2 | 651     | 651         | 39.3 | 2,052   | 2,052       |
| Côte d'Ivoire                           | 11.5 | 566     | 24.2 | 1,509   | 943         | 39.9 | 3,277   | 2,711       |
| DR Congo                                | 3.9  | 594     | 20.3 | 4,066   | 3,472       | 40.8 | 11,600  | 11,000      |
| Ethiopia                                | 26.2 | 5,677   | 32.6 | 9,285   | 3,608       | 40.5 | 15,100  | 9,398       |
| Ghana                                   | 14.3 | 935     | 26.9 | 2,093   | 1,158       | 42.6 | 4,080   | 3,145       |
| Guinea                                  | 4.8  | 124     | 20.1 | 655     | 531         | 39.2 | 1,711   | 1,588       |
| Haiti                                   | 24.5 | 663     | 32.9 | 1,009   | 346         | 43.3 | 1,493   | 829         |
| India                                   | 35.7 | 115,000 | 38.5 | 138,000 | 22,600      | 41.9 | 162,000 | 46,700      |
| Indonesia                               | 45.7 | 31,000  | 45.7 | 32,900  | 1,904       | 45.7 | 34,600  | 3,521       |
| Kenya                                   | 47.1 | 5,076   | 47.7 | 6,592   | 1,516       | 48.5 | 8,575   | 3,499       |
| Laos                                    | 33.4 | 570     | 38.1 | 742     | 171         | 44.1 | 972     | 401         |
| Liberia                                 | 14.2 | 139     | 25.9 | 318     | 179         | 40.6 | 649     | 510         |
| Madagascar                              | 26.2 | 1,395   | 32.8 | 2,246   | 851         | 41.0 | 3,674   | 2,280       |
| Malawi                                  | 45.4 | 1,696   | 44.7 | 2,218   | 522         | 44.0 | 2,984   | 1,289       |
| Mali                                    | 7.6  | 268     | 21.2 | 962     | 694         | 38.1 | 2,427   | 2,160       |
| Mauritania                              | 7.6  | 70      | 22.2 | 259     | 189         | 40.5 | 610     | 540         |

|    |  |                              |      |                |      |                |               |      |                |                |
|----|--|------------------------------|------|----------------|------|----------------|---------------|------|----------------|----------------|
| 1  |  |                              |      |                |      |                |               |      |                |                |
| 2  |  |                              |      |                |      |                |               |      |                |                |
| 3  |  | Mozambique                   | 11.3 | 676            | 23.3 | 1,792          | 1,115         | 38.2 | 4,002          | 3,325          |
| 4  |  | Myanmar                      | 39.5 | 5,503          | 39.5 | 5,956          | 453           | 39.5 | 6,197          | 694            |
| 5  |  | Nepal                        | 34.0 | 2,504          | 38.1 | 3,293          | 789           | 43.4 | 4,078          | 1,574          |
| 6  |  | Niger                        | 5.2  | 192            | 19.2 | 971            | 778           | 36.6 | 2,781          | 2,588          |
| 7  |  | Nigeria                      | 6.2  | 2,364          | 20.5 | 9,773          | 7,409         | 38.5 | 24,200         | 21,900         |
| 8  |  | Pakistan                     | 20.0 | 8,935          | 29.5 | 15,400         | 6,475         | 41.3 | 26,100         | 17,100         |
| 9  |  | Philippines                  | 28.1 | 7,022          | 35.8 | 10,100         | 3,100         | 45.5 | 14,700         | 7,664          |
| 10 |  | Rwanda                       | 36.1 | 974            | 39.2 | 1,326          | 353           | 43.1 | 1,880          | 906            |
| 11 |  | Senegal                      | 12.8 | 429            | 24.7 | 1,040          | 611           | 39.6 | 2,217          | 1,787          |
| 12 |  | Sierra Leone                 | 11.6 | 188            | 23.7 | 479            | 291           | 38.8 | 997            | 809            |
| 13 |  | Solomon Islands              | 24.1 | 33             | 28.0 | 45             | 13            | 32.7 | 64             | 31             |
| 14 |  | South Africa                 | 46.4 | 6,715          | 46.4 | 7,366          | 651           | 46.4 | 8,067          | 1,352          |
| 15 |  | South Sudan                  | 6.3  | 160            | 21.2 | 697            | 537           | 39.9 | 1,715          | 1,555          |
| 16 |  | Togo                         | 11.8 | 195            | 25.1 | 516            | 322           | 41.7 | 1,109          | 915            |
| 17 |  | Uganda                       | 20.5 | 1,652          | 30.7 | 3,355          | 1,703         | 43.4 | 6,715          | 5,062          |
| 18 |  | Tanzania                     | 21.8 | 2,483          | 30.1 | 4,459          | 1,976         | 40.4 | 8,243          | 5,760          |
| 19 |  | Viet Nam                     | 43.4 | 11,200         | 45.8 | 11,900         | 686           | 48.8 | 12,600         | 1,401          |
| 20 |  | Zambia                       | 34.3 | 1,176          | 38.0 | 1,731          | 555           | 42.7 | 2,627          | 1,451          |
| 21 |  | Zimbabwe                     | 50.9 | 1,944          | 50.9 | 2,366          | 422           | 50.9 | 3,010          | 1,066          |
| 22 |  | <b>Subtotal</b>              |      | <b>238,350</b> |      | <b>312,597</b> | <b>73,836</b> |      | <b>423,176</b> | <b>184,372</b> |
| 23 |  |                              |      |                |      |                |               |      |                |                |
| 24 |  |                              |      |                |      |                |               |      |                |                |
| 25 |  |                              |      |                |      |                |               |      |                |                |
| 26 |  |                              |      |                |      |                |               |      |                |                |
| 27 |  |                              |      |                |      |                |               |      |                |                |
| 28 |  |                              |      |                |      |                |               |      |                |                |
| 29 |  |                              |      |                |      |                |               |      |                |                |
| 30 |  |                              |      |                |      |                |               |      |                |                |
| 31 |  | <b>Non-commitment-making</b> |      |                |      |                |               |      |                |                |
| 32 |  | <b>countries (26)</b>        |      |                |      |                |               |      |                |                |
| 33 |  |                              |      |                |      |                |               |      |                |                |
| 34 |  | Bhutan                       | 50.2 | 101            | 50.2 | 114            | 14            | 50.2 | 124            | 23             |
| 35 |  | Bolivia                      | 30.5 | 788            | 37.6 | 1,129          | 341           | 46.6 | 1,590          | 801            |
| 36 |  | Cambodia                     | 28.5 | 1,159          | 35.1 | 1,581          | 422           | 43.3 | 2,281          | 1,121          |
| 37 |  | Central African Republic     | 12.7 | 133            | 24.7 | 292            | 158           | 39.7 | 627            | 493            |
| 38 |  | Comoros                      | 12.0 | 21             | 25.3 | 54             | 33            | 41.9 | 114            | 92             |
| 39 |  | Congo                        | 10.9 | 120            | 24.9 | 334            | 214           | 42.3 | 755            | 635            |
| 40 |  |                              |      |                |      |                |               |      |                |                |
| 41 |  |                              |      |                |      |                |               |      |                |                |
| 42 |  |                              |      |                |      |                |               |      |                |                |
| 43 |  |                              |      |                |      |                |               |      |                |                |
| 44 |  |                              |      |                |      |                |               |      |                |                |
| 45 |  |                              |      |                |      |                |               |      |                |                |
| 46 |  |                              |      |                |      |                |               |      |                |                |
| 47 |  |                              |      |                |      |                |               |      |                |                |

|    |  |                                   |      |                |      |                |               |      |                |                |
|----|--|-----------------------------------|------|----------------|------|----------------|---------------|------|----------------|----------------|
| 1  |  |                                   |      |                |      |                |               |      |                |                |
| 2  |  |                                   |      |                |      |                |               |      |                |                |
| 3  |  |                                   |      |                |      |                |               |      |                |                |
| 4  |  | Egypt                             | 43.8 | 9,961          | 43.8 | 11,200         | 1,256         | 43.8 | 13,200         | 3,262          |
| 5  |  | Eritrea                           | 9.9  | 108            | 23.1 | 311            | 203           | 39.6 | 704            | 595            |
| 6  |  | Gambia                            | 5.6  | 24             | 19.8 | 109            | 85            | 37.6 | 282            | 258            |
| 7  |  | Guinea-Bissau                     | 10.2 | 41             | 18.1 | 90             | 49            | 27.9 | 180            | 139            |
| 8  |  | Honduras                          | 49.0 | 1,104          | 49.0 | 1,319          | 215           | 49.0 | 1,495          | 391            |
| 9  |  | Iraq                              | 28.5 | 2,270          | 33.5 | 3,367          | 1,097         | 39.6 | 5,157          | 2,887          |
| 10 |  | Kyrgyzstan                        | 26.3 | 401            | 32.1 | 501            | 100           | 39.4 | 703            | 301            |
| 11 |  | Lesotho                           | 46.4 | 251            | 46.4 | 290            | 39            | 46.4 | 337            | 86             |
| 12 |  | Mongolia                          | 36.9 | 305            | 39.5 | 331            | 26            | 42.8 | 392            | 87             |
| 13 |  | Nicaragua                         | 59.2 | 960            | 59.2 | 1,053          | 93            | 59.2 | 1,119          | 159            |
| 14 |  | North Korea                       | 58.5 | 3,899          | 58.5 | 3,800          | -100          | 58.5 | 3,654          | -246           |
| 15 |  | Palestine                         | 33.1 | 348            | 37.0 | 490            | 143           | 41.9 | 717            | 369            |
| 16 |  | Papua New Guinea                  | 24.6 | 449            | 32.5 | 717            | 267           | 42.3 | 1,130          | 680            |
| 17 |  | Sao Tome and Principe             | 27.3 | 12             | 36.2 | 19             | 7             | 47.4 | 32             | 20             |
| 18 |  | Sri Lanka                         | 42.1 | 2,251          | 44.6 | 2,374          | 123           | 47.6 | 2,473          | 222            |
| 19 |  | Sudan                             | 6.5  | 552            | 21.1 | 2,240          | 1,688         | 39.3 | 5,425          | 4,873          |
| 20 |  | Tajikistan                        | 20.3 | 428            | 28.0 | 670            | 242           | 37.5 | 1,086          | 657            |
| 21 |  | Timor-Leste                       | 18.2 | 46             | 24.0 | 74             | 28            | 31.1 | 127            | 81             |
| 22 |  | Uzbekistan                        | 39.9 | 3,334          | 40.1 | 3,597          | 263           | 40.3 | 3,964          | 630            |
| 23 |  | Yemen                             | 21.8 | 1,326          | 30.3 | 2,339          | 1,013         | 41.0 | 4,079          | 2,753          |
| 24 |  | <b>Subtotal</b>                   |      | <b>30,395</b>  |      | <b>38,397</b>  | <b>8,019</b>  |      | <b>51,744</b>  | <b>21,372</b>  |
| 25 |  |                                   |      |                |      |                |               |      |                |                |
| 26 |  |                                   |      |                |      |                |               |      |                |                |
| 27 |  |                                   |      |                |      |                |               |      |                |                |
| 28 |  |                                   |      |                |      |                |               |      |                |                |
| 29 |  |                                   |      |                |      |                |               |      |                |                |
| 30 |  |                                   |      |                |      |                |               |      |                |                |
| 31 |  |                                   |      |                |      |                |               |      |                |                |
| 32 |  |                                   |      |                |      |                |               |      |                |                |
| 33 |  | <b>Total (67 focus countries)</b> |      | <b>268,745</b> |      | <b>350,995</b> | <b>81,855</b> |      | <b>474,920</b> | <b>205,744</b> |

Notes: the predicted mCPR for Chad 2012 was rounded to 0; the columns may add up exactly because our statistical models used exact numbers while results are presented in thousands.

Table 4: Modern contraceptive prevalence rate (mCPR) and % demand satisfied (%SD) in 2012, 2020 and 2030 in 36 commitment-making countries: assuming the achievement of FP2020 and extending its mCPR trajectories to 2030

| Country                       | 2020 |             | 2030 |             |
|-------------------------------|------|-------------|------|-------------|
|                               | mCPR | %SD         | mCPR | %SD         |
| <b>Sub-Saharan Africa(26)</b> |      |             |      |             |
| Benin                         | 19.1 | 33.7        | 33.1 | 52.0        |
| Burkina Faso                  | 27.4 | 47.1        | 41.4 | 63.5        |
| Burundi                       | 28.9 | 46.5        | 42.9 | 62.5        |
| Cameroon                      | 27.8 | 48.3        | 41.8 | 64.5        |
| Chad                          | 15.9 | 31.4        | 29.9 | 50.5        |
| Côte d'Ivoire                 | 23.7 | 42.6        | 37.7 | 59.8        |
| DR Congo                      | 18.8 | 33.5        | 32.8 | 51.9        |
| Ethiopia                      | 40.9 | 63.6        | 54.9 | <b>76.7</b> |
| Ghana                         | 32.8 | 50.5        | 46.8 | 65.6        |
| Guinea                        | 15.8 | 31.8        | 29.8 | 50.9        |
| Liberia                       | 28.9 | 49.0        | 42.9 | 65.0        |
| Madagascar                    | 40.4 | 61.4        | 54.4 | <b>74.7</b> |
| Malawi                        | 62.1 | <b>77.7</b> | 76.1 | <b>85.8</b> |
| Mali                          | 21.1 | 42.6        | 35.1 | 60.5        |
| Mauritania                    | 22.7 | 40.8        | 36.7 | 58.3        |
| Mozambique                    | 22.5 | 45.6        | 36.5 | 63.1        |
| Niger                         | 23.4 | 49.9        | 37.4 | 67.2        |
| Nigeria                       | 22.0 | 44.7        | 36.0 | 62.3        |
| Rwanda                        | 56.8 | 73.3        | 70.8 | <b>82.6</b> |
| Senegal                       | 27.3 | 48.6        | 41.3 | 65.0        |
| Sierra Leone                  | 24.9 | 47.9        | 38.9 | 64.9        |
| South Sudan                   | 12.9 | 23.8        | 26.9 | 43.6        |
| Togo                          | 26.9 | 42.8        | 40.9 | 59.3        |
| Uganda                        | 37.0 | 54.6        | 51.0 | 68.7        |
| Tanzania                      | 40.5 | 63.8        | 54.5 | <b>77.0</b> |
| Zambia                        | 53.1 | 72.0        | 67.1 | <b>82.2</b> |
| <b>Other regions (10)</b>     |      |             |      |             |
| Afghanistan                   | 31.0 | 56.9        | 45.0 | 72.4        |
| Bangladesh                    | 70.5 | <b>83.1</b> | 84.5 | <b>89.2</b> |
| Haiti                         | 42.5 | 59.7        | 56.5 | 72.5        |
| India                         | 59.1 | <b>78.0</b> | 73.1 | <b>86.8</b> |
| Laos                          | 53.9 | 70.1        | 67.9 | <b>80.2</b> |

|                 |      |             |      |             |
|-----------------|------|-------------|------|-------------|
| Nepal           | 54.4 | 72.1        | 68.4 | <b>82.0</b> |
| Pakistan        | 37.3 | 57.7        | 51.3 | 71.6        |
| Philippines     | 48.3 | 62.7        | 62.3 | 74.0        |
| Solomon Islands | 38.6 | 73.3        | 52.6 | <b>87.0</b> |
| Viet Nam        | 69.7 | <b>77.3</b> | 83.7 | <b>83.6</b> |

Notes: bold indicates reaching the target of satisfying 75% demand for family planning; Madagascar's 74.7% in 2030 can be rounded to 75%.

For peer review only

1  
2  
3  
4  
5  
6  
7  
8  
9  
10  
11  
12  
13  
14  
15  
16  
17  
18  
19  
20  
21  
22  
23  
24  
25  
26  
27  
28  
29  
30  
31  
32  
33  
34  
35  
36  
37  
38  
39  
40  
41  
42  
43  
44  
45  
46  
47  
48  
49  
50  
51  
52  
53  
54  
55  
56  
57  
58  
59  
60



Figure 1: Analytical flowchart for the two research questions



Figure 2: Number of additional modern contraceptive users in 41 pledging and 26 non-pledging countries assuming the trajectory of satisfying 75% demand by 2030

## STROBE Statement—checklist of items that should be included in reports of observational studies

|                              | Item No. | Recommendation                                                                                                                                                                                                                                                                                                                                                                                                                                                         | Page No. |
|------------------------------|----------|------------------------------------------------------------------------------------------------------------------------------------------------------------------------------------------------------------------------------------------------------------------------------------------------------------------------------------------------------------------------------------------------------------------------------------------------------------------------|----------|
| <b>Title and abstract</b>    | 1        | (a) Indicate the study's design with a commonly used term in the title or the abstract                                                                                                                                                                                                                                                                                                                                                                                 | 1        |
|                              |          | (b) Provide in the abstract an informative and balanced summary of what was done and what was found                                                                                                                                                                                                                                                                                                                                                                    | 2-3      |
| <b>Introduction</b>          |          |                                                                                                                                                                                                                                                                                                                                                                                                                                                                        |          |
| Background/rationale         | 2        | Explain the scientific background and rationale for the investigation being reported                                                                                                                                                                                                                                                                                                                                                                                   | 4-6      |
| Objectives                   | 3        | State specific objectives, including any prespecified hypotheses                                                                                                                                                                                                                                                                                                                                                                                                       | 6        |
| <b>Methods</b>               |          |                                                                                                                                                                                                                                                                                                                                                                                                                                                                        |          |
| Study design                 | 4        | Present key elements of study design early in the paper                                                                                                                                                                                                                                                                                                                                                                                                                | 6        |
| Setting                      | 5        | Describe the setting, locations, and relevant dates, including periods of recruitment, exposure, follow-up, and data collection                                                                                                                                                                                                                                                                                                                                        | 6-7      |
| Participants                 | 6        | (a) <i>Cohort study</i> —Give the eligibility criteria, and the sources and methods of selection of participants. Describe methods of follow-up<br><i>Case-control study</i> —Give the eligibility criteria, and the sources and methods of case ascertainment and control selection. Give the rationale for the choice of cases and controls<br><i>Cross-sectional study</i> —Give the eligibility criteria, and the sources and methods of selection of participants | n/a      |
|                              |          | (b) <i>Cohort study</i> —For matched studies, give matching criteria and number of exposed and unexposed<br><i>Case-control study</i> —For matched studies, give matching criteria and the number of controls per case                                                                                                                                                                                                                                                 | n/a      |
| Variables                    | 7        | Clearly define all outcomes, exposures, predictors, potential confounders, and effect modifiers. Give diagnostic criteria, if applicable                                                                                                                                                                                                                                                                                                                               | 6-8      |
| Data sources/<br>measurement | 8*       | For each variable of interest, give sources of data and details of methods of assessment (measurement). Describe comparability of assessment methods if there is more than one group                                                                                                                                                                                                                                                                                   | 6-11     |
| Bias                         | 9        | Describe any efforts to address potential sources of bias                                                                                                                                                                                                                                                                                                                                                                                                              | 6-11     |
| Study size                   | 10       | Explain how the study size was arrived at                                                                                                                                                                                                                                                                                                                                                                                                                              | 6        |

Continued on next page



|                        |     |                                                                                                                                                                                                                    |       |
|------------------------|-----|--------------------------------------------------------------------------------------------------------------------------------------------------------------------------------------------------------------------|-------|
| Quantitative variables | 11  | Explain how quantitative variables were handled in the analyses. If applicable, describe which groupings were chosen and why                                                                                       | 6-8   |
| Statistical methods    | 12  | (a) Describe all statistical methods, including those used to control for confounding                                                                                                                              | 6-11  |
|                        |     | (b) Describe any methods used to examine subgroups and interactions                                                                                                                                                | n/a   |
|                        |     | (c) Explain how missing data were addressed                                                                                                                                                                        | n/a   |
|                        |     | (d) <i>Cohort study</i> —If applicable, explain how loss to follow-up was addressed                                                                                                                                | n/a   |
|                        |     | <i>Case-control study</i> —If applicable, explain how matching of cases and controls was addressed<br><i>Cross-sectional study</i> —If applicable, describe analytical methods taking account of sampling strategy |       |
|                        |     | (e) Describe any sensitivity analyses                                                                                                                                                                              | n/a   |
| <b>Results</b>         |     |                                                                                                                                                                                                                    |       |
| Participants           | 13* | (a) Report numbers of individuals at each stage of study—eg numbers potentially eligible, examined for eligibility, confirmed eligible, included in the study, completing follow-up, and analysed                  | n/a   |
|                        |     | (b) Give reasons for non-participation at each stage                                                                                                                                                               | n/a   |
|                        |     | (c) Consider use of a flow diagram                                                                                                                                                                                 | n/a   |
| Descriptive data       | 14* | (a) Give characteristics of study participants (eg demographic, clinical, social) and information on exposures and potential confounders                                                                           | n/a   |
|                        |     | (b) Indicate number of participants with missing data for each variable of interest                                                                                                                                | n/a   |
|                        |     | (c) <i>Cohort study</i> —Summarise follow-up time (eg, average and total amount)                                                                                                                                   | n/a   |
| Outcome data           | 15* | <i>Cohort study</i> —Report numbers of outcome events or summary measures over time                                                                                                                                | n/a   |
|                        |     | <i>Case-control study</i> —Report numbers in each exposure category, or summary measures of exposure                                                                                                               | n/a   |
|                        |     | <i>Cross-sectional study</i> —Report numbers of outcome events or summary measures                                                                                                                                 | n/a   |
| Main results           | 16  | (a) Give unadjusted estimates and, if applicable, confounder-adjusted estimates and their precision (eg, 95% confidence interval). Make clear which confounders were adjusted for and why they were included       | 11-13 |
|                        |     | (b) Report category boundaries when continuous variables were categorized                                                                                                                                          | n/a   |
|                        |     | (c) If relevant, consider translating estimates of relative risk into absolute risk for a meaningful time period                                                                                                   | n/a   |

Continued on next page

|                          |    |                                                                                                                                                                            |       |
|--------------------------|----|----------------------------------------------------------------------------------------------------------------------------------------------------------------------------|-------|
| Other analyses           | 17 | Report other analyses done—eg analyses of subgroups and interactions, and sensitivity analyses                                                                             | n/a   |
| <b>Discussion</b>        |    |                                                                                                                                                                            |       |
| Key results              | 18 | Summarise key results with reference to study objectives                                                                                                                   | 11-13 |
| Limitations              | 19 | Discuss limitations of the study, taking into account sources of potential bias or imprecision. Discuss both direction and magnitude of any potential bias                 | 16-17 |
| Interpretation           | 20 | Give a cautious overall interpretation of results considering objectives, limitations, multiplicity of analyses, results from similar studies, and other relevant evidence | 17    |
| Generalisability         | 21 | Discuss the generalisability (external validity) of the study results                                                                                                      | 17    |
| <b>Other information</b> |    |                                                                                                                                                                            |       |
| Funding                  | 22 | Give the source of funding and the role of the funders for the present study and, if applicable, for the original study on which the present article is based              | 18    |

\*Give information separately for cases and controls in case-control studies and, if applicable, for exposed and unexposed groups in cohort and cross-sectional studies.

**Note:** An Explanation and Elaboration article discusses each checklist item and gives methodological background and published examples of transparent reporting. The STROBE checklist is best used in conjunction with this article (freely available on the Web sites of PLoS Medicine at <http://www.plosmedicine.org/>, Annals of Internal Medicine at <http://www.annals.org/>, and Epidemiology at <http://www.epidem.com/>). Information on the STROBE Initiative is available at [www.strobe-statement.org](http://www.strobe-statement.org).
